# Supplementary material for: Oral function and cumulative long-term care costs among older Japanese adults: a prospective 6-year follow-up study of long care receipt data
Source: PubMed Central journal article supplement — BMJ Open. 2023 Feb 14;13(2):e066349. doi: 10.1136/bmjopen-2022-066349 (PMC9930558; doi:10.1136/bmjopen-2022-066349), 2023-02-14
Supplement: bmjopen-2022-066349.draft_revisions.pdf [file bmjopen-2022-066349.draft_revisions.pdf]

# BMJ Open

BMJ Open is committed to open peer review. As part of this commitment we make the peer review history of every article we publish publicly available.

When an article is published we post the peer reviewers' comments and the authors' responses online. We also post the versions of the paper that were used during peer review. These are the versions that the peer review comments apply to.

The versions of the paper that follow are the versions that were submitted during the peer review process. They are not the versions of record or the final published versions. They should not be cited or distributed as the published version of this manuscript.

BMJ Open is an open access journal and the full, final, typeset and author-corrected version of record of the manuscript is available on our site with no access controls, subscription charges or pay-per-view fees (<http://bmjopen.bmj.com>).

If you have any questions on BMJ Open's open peer review process please email [info.bmjopen@bmj.com](mailto:info.bmjopen@bmj.com)

# BMJ Open

## Oral function and cumulative long-term care costs among older Japanese adults: A prospective six-year follow-up study of long care receipt data

|                               |                                                                                                                                                                                                                                                                                                                                                                                                                                                                                                                                                                                                                               |
|-------------------------------|-------------------------------------------------------------------------------------------------------------------------------------------------------------------------------------------------------------------------------------------------------------------------------------------------------------------------------------------------------------------------------------------------------------------------------------------------------------------------------------------------------------------------------------------------------------------------------------------------------------------------------|
| Journal:                      | <i>BMJ Open</i>                                                                                                                                                                                                                                                                                                                                                                                                                                                                                                                                                                                                               |
| Manuscript ID                 | bmjopen-2022-066349                                                                                                                                                                                                                                                                                                                                                                                                                                                                                                                                                                                                           |
| Article Type:                 | Original research                                                                                                                                                                                                                                                                                                                                                                                                                                                                                                                                                                                                             |
| Date Submitted by the Author: | 05-Jul-2022                                                                                                                                                                                                                                                                                                                                                                                                                                                                                                                                                                                                                   |
| Complete List of Authors:     | Kojima, Kaori; Hamamatsu University School of Medicine, Department of Community Health and Preventive Medicine<br>Saito, Masashige; Nihon Fukushi University, Faculty of Social Welfare; Nihon Fukushi University, Center for Well-Being and Society<br>Miyaguni, Yasuhiro; Nihon Fukushi University, Faculty of Social Welfare; National Center for Geriatrics and Gerontology, Center for Gerontology and Social Science<br>Okada, Eisaku; Hosei University, Faculty of Social Policy & Administration<br>Ojima, Toshiyuki; Hamamatsu University School of Medicine, Department of Community Health and Preventive Medicine |
| Keywords:                     | GERIATRIC MEDICINE, ORAL MEDICINE, PUBLIC HEALTH, Health policy < HEALTH SERVICES ADMINISTRATION & MANAGEMENT                                                                                                                                                                                                                                                                                                                                                                                                                                                                                                                 |
|                               |                                                                                                                                                                                                                                                                                                                                                                                                                                                                                                                                                                                                                               |

SCHOLARONE™  
Manuscripts

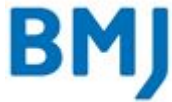

I, the Submitting Author has the right to grant and does grant on behalf of all authors of the Work (as defined in the below author licence), an exclusive licence and/or a non-exclusive licence for contributions from authors who are: i) UK Crown employees; ii) where BMJ has agreed a CC-BY licence shall apply, and/or iii) in accordance with the terms applicable for US Federal Government officers or employees acting as part of their official duties; on a worldwide, perpetual, irrevocable, royalty-free basis to BMJ Publishing Group Ltd ("BMJ") its licensees and where the relevant Journal is co-owned by BMJ to the co-owners of the Journal, to publish the Work in this journal and any other BMJ products and to exploit all rights, as set out in our [licence](#).

The Submitting Author accepts and understands that any supply made under these terms is made by BMJ to the Submitting Author unless you are acting as an employee on behalf of your employer or a postgraduate student of an affiliated institution which is paying any applicable article publishing charge ("APC") for Open Access articles. Where the Submitting Author wishes to make the Work available on an Open Access basis (and intends to pay the relevant APC), the terms of reuse of such Open Access shall be governed by a Creative Commons licence – details of these licences and which [Creative Commons](#) licence will apply to this Work are set out in our licence referred to above.

Other than as permitted in any relevant BMJ Author's Self Archiving Policies, I confirm this Work has not been accepted for publication elsewhere, is not being considered for publication elsewhere and does not duplicate material already published. I confirm all authors consent to publication of this Work and authorise the granting of this licence.

1  
2  
3  
4 **Oral function and cumulative long-term care costs among older Japanese adults: A**  
5  
6 **prospective six-year follow-up study of long care receipt data**  
7

8  
9 Kaori Kojima MSc<sup>1</sup>, Masashige Saito PhD<sup>2,3</sup>, Yasuhiro Miyaguni PhD<sup>2,4</sup>, Eisaku Okada PhD<sup>5</sup>,  
10  
11 Toshiyuki Ojima MD, PhD<sup>1</sup>  
12  
13

14  
15  
16  
17 <sup>1</sup> Department of Community Health and Preventive Medicine, Hamamatsu University School  
18  
19 of Medicine, 1-20-1 Handayama, Higashi-ku, Hamamatsu city, Shizuoka 431-3192, Japan  
20  
21

22 <sup>2</sup> Faculty of Social Welfare, Nihon Fukushi University, Okuda, Mihama-cho, Chita-gun, Aichi  
23  
24 470-3295, Japan  
25  
26

27 <sup>3</sup> Center for Well-Being and Society, Nihon Fukushi University, 5-22-35 Chiyoda, Naka-ku,  
28  
29 Nagoya 460-0012, Japan  
30  
31

32  
33 <sup>4</sup> Center for Gerontology and Social Science, National Center for Geriatrics and Gerontology,  
34  
35 7-430 Morioka-cho, Obu City, Aichi 474-8511, Japan  
36  
37

38 <sup>5</sup> Faculty of Social Policy & Administration, Hosei University, 4342 Aihara, Machida, Tokyo,  
39  
40 194-0298, Japan  
41  
42

43 **Corresponding author:**  
44

45  
46 Toshiyuki Ojima  
47

48  
49 Department of Community Health and Preventive Medicine, Hamamatsu University School of  
50  
51 Medicine  
52

53  
54 1-20-1 Handayama, Higashiku, Hamamatsu, 431-3192, JAPAN  
55

56  
57 E-mail [ojima@hama-med.ac.jp](mailto:ojima@hama-med.ac.jp)  
58

59 TEL +81-53-435-2333 FAX +81-53-435-2341  
60

**Word count:**

3641 words

**ABSTRACT**

Objectives: This study evaluated the relationship between oral function and long-term care service costs.

Design: This was a prospective six-year follow-up study of survey data

Setting: These data were obtained from the Japan Gerontological Evaluation Study conducted from 2010 to 2011.

Participants: The participants were functionally independent older adults in 12 municipalities across Japan.

Interventions: Care service benefit costs were tracked over six years using publicly available claims records (n = 46,616) to monitor respondents' cumulative care costs.

Primary and secondary outcome measures: The primary outcome variable was the cumulative cost of long-term care insurance services during the follow-up period. We adjusted for the presence or absence of oral function problems, age, sex, physical function, and socioeconomic and lifestyle background.

Results: Tobit analysis revealed that, compared to those with no oral function problems, cumulative long-term care service benefit costs for those with one, two, or three oral function problems were approximately 4000, 47000, and 82000 USD respectively over six years. Compared to those with maintained oral function, there was a maximum difference of approximately 82000 USD in long-term care service costs for those with oral function

1  
2  
3  
4 problems. As oral problems intensified, the cost of long-term care was increased..  
5  
6

7 Conclusions: Oral function in older people was associated with cumulative long-term care  
8 insurance costs. The oral function of older people should be maintained to reduce future  
9 accumulated long-term care insurance costs. Compared to those with maintained oral function,  
10 there was a maximum difference of approximately 82000 USD in long-term care service costs  
11 for those with oral function problems. The cost of long-term care was amplified as oral  
12 problems increased.  
13  
14  
15  
16  
17  
18  
19  
20

### 21 **Strengths and limitations**

- 22 • The strength of this study is that it used a large-scale dataset involving data from  
23 numerous municipalities
- 24 • Because this was a questionnaire survey, it did not capture the entire population of older  
25 people living at home
- 26 • Selection bias may exist due to a valid response rate of 64.7%
- 27 • The follow-up period of 6 years was too short to reflect the lifetime cost of care
- 28 • The data were not adjusted for diseases and did not consider the type of healthcare  
29 service used
- 30  
31  
32  
33  
34  
35  
36  
37  
38  
39  
40  
41

42 **Keywords:** oral function, older adults, care cost, long-term care insurance  
43  
44  
45  
46  
47  
48  
49  
50  
51  
52  
53  
54  
55  
56  
57  
58  
59  
60

## INTRODUCTION

Globally, life expectancy is increasing. In Japan, the need for long-term care services is pressing, with the increase in the number of older people requiring long-term care and the lengthening of the period during which care is needed.[1] Of the 35.55 million insured people aged 65 and over, the number of those certified as requiring nursing care or support was 6.69 million in 2019 and is growing.[2] One in four to five persons aged 65 and over requires long-term care. The medical expenses in the fiscal year 2019 for those aged 65 and over amounted to 270.629 billion USD. Additionally, the total number of long-term care insurance (LTCI) benefits in 2019 were reported to be 160.63 million, and the cost was 104.567 billion USD.[3] The number of people insured by LTCI increased by 0.8% compared to that in the previous year. However, according to population estimates, 35.88 million of the 78.2 million people over the age of 40 as of 2019 will be aged 65 or older, and the amount of delinquent LTCI premiums is increasing.[4] The insured's LTCI premiums were raised from USD 58.69 to 60.14 in 2021. This is a predicament that will lead to a tightening of finances and household budgets.[5]

An association between chewing function and oral function in older adults and overall health, physical fitness, and mortality risk has been reported.[6] Additionally, overall muscle strength declines with age. Among other organs associated with the oral cavity, muscle fibers in the tongue decrease with age.[7] Furthermore, a decrease in overall body muscle mass affects mastication.[6] The decline in physical function due to muscle weakness resulting from a decrease in skeletal muscle mass is referred to as sarcopenia.[8] Poor oral function is associated with physical frailty and sarcopenia. Moreover, sarcopenia is also associated with dysphagia.[9] The decline in eating function in old age is a cause of serious diseases, such as malnutrition, and is closely related to life expectancy.[10]

1  
2  
3  
4  
5  
6  
7 It is presumed that older people with oral function decline may incur higher nursing care costs  
8  
9 due to the greater use of services. Care-need prevention is important to reduce the cost of  
10  
11 government LTCI benefits. Particularly, it is necessary to shift the emphasis to prevention for  
12  
13 those who require light nursing care. Oral frailty[11] has been investigated recently and  
14  
15 evidence suggests that maintaining function from an early stage will help maintain oral  
16  
17 function and, in the long run, prevent a decline in feeding and swallowing function.  
18  
19

20  
21 The association between oral function and health care costs has been reported.[12–14]  
22  
23 However, there are currently no reports on the cumulative cost of LTCI. This study aimed to  
24  
25 clarify the association between oral function and LTCI costs among older people based on  
26  
27 claim records through a questionnaire survey conducted among Japanese older people in  
28  
29 several municipalities.  
30  
31  
32  
33  
34  
35

## 36 **METHODS**

### 37 38 **Study sample**

39  
40  
41 The baseline population data were acquired from a self-report questionnaire survey of  
42  
43 community-dwelling people aged 65 years or older, with no physical or cognitive disabilities,  
44  
45 and not receiving long-term care. Our data were derived from the Japan Gerontological  
46  
47 Evaluation Study (JAGES).[15] The survey was sent by mail to residents of 12 municipalities  
48  
49 between August 2010 and January 2012 and included sex. In total, 51302 responses were  
50  
51 received (valid response rate: 64.7%) and unknown age was excluded. We obtained claim  
52  
53 records from a governmental database regarding public LTCI benefits over a period of six years  
54  
55 every month from the baseline survey.  
56  
57  
58  
59  
60



1  
2  
3  
4 To ascertain the respondents' subsequent use of LTCIs, data on the certification of long-term  
5 care needs and information on the imposition of LTCI premiums held by the insurers were  
6 collected in encrypted form. The data were combined on an individual basis based on the  
7 encrypted IDs to create a cohort data set. A total of 46616 individuals (90.9% follow-up rate),  
8 excluding untraceable cases, were included in the analysis.  
9  
10  
11  
12  
13  
14

### 15 **Outcome variables**

16  
17  
18 The outcome variable was the cumulative cost of LTCI services during the follow-up period.  
19 Information regarding LTCI costs or deaths was collected from the municipalities. Information  
20 regarding long-term care costs was ascertained based on the number-of-use points in the LTCI  
21 costs performance information, which was incorporated from the month the questionnaire  
22 survey was administered through November 2016. LTCI costs were ascertained for long-term  
23 care services used similar to the follow-up period from August 2010 to November 2016.  
24  
25  
26  
27  
28  
29  
30  
31

32  
33 Since the use of long-term care services is expected to be seasonally skewed, the analysis used  
34 a cumulative total of all service costs used during the follow-up period. The long-term care  
35 costs handled in this analysis are LTCI costs. The public LTCI do not include the cost of self-  
36 paid long-term care services not listed in the information on actual long-term care insurance  
37 services. Costs for the purchase of welfare equipment and home modification were also not  
38 included. The independent variable was the cumulative cost of LTCI benefits over six years.  
39  
40  
41  
42  
43  
44  
45  
46  
47  
48  
49  
50  
51  
52  
53  
54  
55  
56  
57  
58  
59  
60

The respondents were divided into three groups based on cumulative costs: 0 USD, less than  
1–5 million USD (JPY 1–500 million), and more than 5 million USD (JPY 500 million). We  
used a currency exchange rate of JPY 100 to USD 1.

### 54 **Explanatory variables**

56  
57 Explanatory variables were those related to oral function. The Kihon Checklist was created by  
58 the Ministry of Health, Labour and Welfare in Japan to help people aged 65 or older reflect on  
59  
60

1  
2  
3  
4 their lives and health status and check for any decline in their physical or mental functions. The  
5 self-administered questionnaire consists of 25 questions on daily living and physical and  
6 mental functions which are answered with "yes" or "no" responses: five items to evaluate  
7 activities related to daily living, five items evaluate motor functions, two items evaluate low  
8 nutritional status, three items evaluate oral functions, two items evaluate seclusion, three items  
9 evaluate cognitive functions, and five items evaluate physical and mental functions. The  
10 questionnaire group consists of questions in seven areas of depressive mood assessment. For  
11 each question, one point is added when a problem in daily functioning is considered to exist,  
12 and the higher the score, the more problems in daily functioning are evaluated.[16] The  
13 following three items related to oral function were used in this survey: "Do you find chewing  
14 hard food more difficult compared to half a year earlier? Have you ever choked on tea or soup?  
15 Are you bothered by a feeling of thirst?" A response of yes to two or more of these was  
16 considered poor oral function and one yes or none was considered normal.[17,18]

### 33 **Covariates**

34  
35  
36 Sex, age, educational attainment, household equivalized income, and marital status were used  
37 as basic attributes to be considered when examining the association with the use of long-term  
38 care services. Regarding demographic attributes, age was divided into five groups: 65–69, 70–  
39 74, 75–79, 80–84, and 85 years and older, socioeconomic background was categorized per  
40 household equivalized income (USD <2 million, 2–4 million,  $\geq$ 4 million). Household  
41 equivalized income was calculated by dividing the total income of the entire household by the  
42 square root of the number of household members. Educational attainment was surveyed: <9,  
43 9–12, >13 years of schooling). Life background including marital status was categorized as  
44 currently married, other as not married. Health self-assessment, Geriatric Depression Rating  
45 Scale (GDS),[19] activities of daily living (ADL), and smoking status were used as indicators  
46 of health status. Subjective health was classified as good (very good, fair) or poor (not so good,  
47  
48  
49  
50  
51  
52  
53  
54  
55  
56  
57  
58  
59  
60

1  
2  
3  
4 poor), and the 15-item Geriatric Depression Scale (0–4 no depression, 5–10 mild depression,  
5  
6 and 11–15 severe depression) was used to evaluate depression. Smoking status was classified  
7  
8 as no (never smoked, <4 years) and yes ( $\leq$ 4 years not smoking, still smoking). Missing values  
9  
10 in the covariates were dummy coded and included as the “Missing” category in the analysis.  
11  
12

### 13 **Statistical analyses**

14  
15  
16 Descriptive statistics were reviewed on the percentages of LTCI costs over six years, divided  
17  
18 into three groups: zero, less than 1–5 million, and more than 5 million. Results are expressed  
19  
20 as the number of applicable cases (%). Percentage comparisons were analyzed using the chi-  
21  
22 square test. Next, the six-year cumulative LTCI costs were used as the independent variable to  
23  
24 evaluate the association with oral function. The analysis was conducted using the tobit  
25  
26 model,[20,21] taking into account that the independent variable was not normally distributed  
27  
28 with a concentration in the zero circles. In the analysis, after initially analyzing with the crude  
29  
30 model, the adjustment variables were put in the following order. Age and sex were added to  
31  
32 model 1, while physical factors (ADL, GDS, smoking) and socioeconomic background (years  
33  
34 of education, marital status, equivalent income) were added to model 2. Standard errors were  
35  
36 used to estimate regression coefficients. Statistical analyses were conducted using STATA  
37  
38 15.1. The statistical significance level was set at  $p < 0.05$ .  
39  
40  
41  
42  
43  
44  
45  
46

### 47 **Patient and public involvement**

48  
49  
50 No patient or the public was involved in the development of research question and design of  
51  
52 this study. The results of this research will be disseminated to stakeholders such as local and  
53  
54 central health government after being published in a scientific journal.  
55  
56  
57  
58  
59  
60

## Results

Table 1. Characteristics of the surveyed participants

| Variables            | Categories   | 1 to 4.99 million |        |      |        |                    |        | Total | p-value |
|----------------------|--------------|-------------------|--------|------|--------|--------------------|--------|-------|---------|
|                      |              | No cost           |        | USD  |        | Over 5 million USD |        |       |         |
|                      |              | n                 | %      | n    | %      | n                  | %      |       |         |
|                      |              | 39268             | 84.23% | 6257 | 13.40% | 1091               | 2.37%  | 46616 |         |
| Sex                  | male         | 18502             | 85.70% | 2715 | 12.60% | 368                | 1.70%  | 21585 | <0.01   |
|                      | female       | 20766             | 83.00% | 3542 | 14.20% | 723                | 2.90%  | 25031 |         |
| Age                  | 65-69        | 12712             | 95.90% | 490  | 3.70%  | 54                 | 0.40%  | 13256 | <0.01   |
|                      | 70-74        | 12582             | 91.50% | 1039 | 7.60%  | 123                | 0.90%  | 13744 |         |
|                      | 75-79        | 8584              | 81.50% | 1705 | 16.20% | 247                | 2.30%  | 10536 |         |
|                      | 80-84        | 4005              | 65.20% | 1799 | 29.30% | 335                | 5.50%  | 6139  |         |
|                      | 85 and older | 1385              | 47.10% | 1224 | 41.60% | 332                | 11.30% | 2941  |         |
| Oral<br>function     | normal       | 30660             | 86.40% | 4098 | 11.60% | 718                | 2.00%  | 35476 | <0.01   |
|                      | poor         | 5147              | 76.80% | 1340 | 20.00% | 219                | 3.30%  | 6706  |         |
| Choked               | no           | 31160             | 85.70% | 4399 | 12.10% | 790                | 2.20%  | 36349 | <0.01   |
|                      | yes          | 5728              | 78.90% | 1325 | 18.30% | 206                | 2.80%  | 7259  |         |
|                      | missing      | 16                | 66.70% | 8    | 33.30% | 0                  | 0.00%  | 24    |         |
| Difficulty<br>eating | no           | 27496             | 86.80% | 3565 | 11.30% | 609                | 1.90%  | 31670 | <0.01   |
|                      | yes          | 9566              | 78.70% | 2193 | 18.00% | 397                | 3.30%  | 12156 |         |
|                      | missing      | 9                 | 81.80% | 1    | 9.10%  | 1                  | 9.10%  | 11    |         |

|    |          |               |       |        |      |        |     |        |       |       |
|----|----------|---------------|-------|--------|------|--------|-----|--------|-------|-------|
| 1  |          |               |       |        |      |        |     |        |       |       |
| 2  |          |               |       |        |      |        |     |        |       |       |
| 3  |          |               |       |        |      |        |     |        |       |       |
| 4  |          | Dry           |       |        |      |        |     |        |       |       |
| 5  | Mouth    | no            | 28898 | 86.30% | 3911 | 11.70% | 673 | 2.00%  | 33482 | <0.01 |
| 6  |          |               |       |        |      |        |     |        |       |       |
| 7  |          | yes           | 7401  | 79.00% | 1674 | 17.90% | 299 | 3.20%  | 9374  |       |
| 8  |          |               |       |        |      |        |     |        |       |       |
| 9  |          |               |       |        |      |        |     |        |       |       |
| 10 |          | missing       | 1     | 25.00% | 2    | 50.00% | 1   | 25.00% | 4     |       |
| 11 |          |               |       |        |      |        |     |        |       |       |
| 12 |          | Activities    |       |        |      |        |     |        |       |       |
| 13 |          |               |       |        |      |        |     |        |       |       |
| 14 |          | of Daily      |       |        |      |        |     |        |       |       |
| 15 | Living   | independent   | 37784 | 85.10% | 5677 | 12.80% | 918 | 2.10%  | 44379 | <0.01 |
| 16 |          |               |       |        |      |        |     |        |       |       |
| 17 |          | minimum       |       |        |      |        |     |        |       |       |
| 18 |          | assist        | 367   | 47.70% | 294  | 38.20% | 108 | 14.00% | 769   |       |
| 19 |          |               |       |        |      |        |     |        |       |       |
| 20 |          | assist        | 96    | 67.60% | 32   | 22.50% | 14  | 9.90%  | 142   |       |
| 21 |          |               |       |        |      |        |     |        |       |       |
| 22 |          | missing       | 1014  | 77.70% | 246  | 18.90% | 45  | 3.40%  | 1305  |       |
| 23 |          |               |       |        |      |        |     |        |       |       |
| 24 |          |               |       |        |      |        |     |        |       |       |
| 25 |          |               |       |        |      |        |     |        |       |       |
| 26 |          | Depressive    |       |        |      |        |     |        |       |       |
| 27 |          |               |       |        |      |        |     |        |       |       |
| 28 | symptoms | no depression | 24093 | 87.70% | 2953 | 10.70% | 428 | 1.60%  | 27474 | <0.01 |
| 29 |          |               |       |        |      |        |     |        |       |       |
| 30 |          | mild          |       |        |      |        |     |        |       |       |
| 31 |          | depression    | 6589  | 80.40% | 1347 | 16.40% | 260 | 3.20%  | 8196  |       |
| 32 |          |               |       |        |      |        |     |        |       |       |
| 33 |          | depression    | 2052  | 75.40% | 549  | 20.20% | 120 | 4.40%  | 2721  |       |
| 34 |          |               |       |        |      |        |     |        |       |       |
| 35 |          | missing       | 6534  | 79.40% | 1408 | 17.10% | 283 | 3.40%  | 8225  |       |
| 36 |          |               |       |        |      |        |     |        |       |       |
| 37 |          |               |       |        |      |        |     |        |       |       |
| 38 |          |               |       |        |      |        |     |        |       |       |
| 39 | Smoking  | no            | 29410 | 84.50% | 4574 | 13.10% | 804 | 2.30%  | 34788 | 0.02  |
| 40 |          |               |       |        |      |        |     |        |       |       |
| 41 |          | yes           | 5948  | 85.60% | 872  | 12.50% | 132 | 1.90%  | 6952  |       |
| 42 |          |               |       |        |      |        |     |        |       |       |
| 43 |          | missing       | 3910  | 80.20% | 811  | 16.60% | 155 | 3.20%  | 4876  |       |
| 44 |          |               |       |        |      |        |     |        |       |       |
| 45 |          |               |       |        |      |        |     |        |       |       |
| 46 |          | Marital       |       |        |      |        |     |        |       |       |
| 47 |          |               |       |        |      |        |     |        |       |       |
| 48 | status   | married       | 28632 | 87.40% | 3615 | 11.00% | 517 | 1.60%  | 32764 | <0.01 |
| 49 |          |               |       |        |      |        |     |        |       |       |
| 50 |          | others        | 9741  | 76.80% | 2413 | 19.00% | 530 | 4.20%  | 12684 |       |
| 51 |          |               |       |        |      |        |     |        |       |       |
| 52 |          | missing       | 895   | 76.60% | 229  | 19.60% | 44  | 3.80%  | 1168  |       |
| 53 |          |               |       |        |      |        |     |        |       |       |
| 54 |          | Equivalent    |       |        |      |        |     |        |       |       |
| 55 |          |               |       |        |      |        |     |        |       |       |
| 56 | income   | low           | 16151 | 84.20% | 2562 | 13.40% | 463 | 2.40%  | 19176 | <0.01 |
| 57 |          |               |       |        |      |        |     |        |       |       |
| 58 |          |               |       |        |      |        |     |        |       |       |
| 59 |          |               |       |        |      |        |     |        |       |       |
| 60 |          |               |       |        |      |        |     |        |       |       |

|           |             |       |        |      |        |     |       |       |       |
|-----------|-------------|-------|--------|------|--------|-----|-------|-------|-------|
|           | middle      | 12585 | 87.00% | 1617 | 11.20% | 260 | 1.80% | 14462 |       |
|           | high        | 3625  | 88.00% | 432  | 10.50% | 60  | 1.50% | 4117  |       |
|           | missing     | 6907  | 77.90% | 1646 | 18.60% | 308 | 3.50% | 8861  |       |
| Education | 6-9 years   | 18271 | 82.20% | 3349 | 15.10% | 615 | 2.80% | 22235 | <0.01 |
|           | 10-12 years | 13147 | 86.60% | 1758 | 11.60% | 277 | 1.80% | 15182 |       |
|           | >13 years   | 6917  | 87.70% | 854  | 10.80% | 118 | 1.50% | 7889  |       |
|           | missing     | 933   | 71.20% | 296  | 22.60% | 81  | 6.20% | 1310  |       |

The total number of participants is shown as a percentage.

Comparisons were made using the chi-square test.

For missing values, missing categories were created and included in the analysis.

Table 1 shows the six-year cumulative LTCI and the list of covered persons. The chi-square test indicated significant differences for all variables. Next, to investigate the relationship between oral function and the costs associated with the use of LTCI, we conducted a tobit analysis using the data on cumulative LTCI costs over 6 years as the independent variable and oral function as the explanatory variable (Table 2). Compared to persons with normal oral function, the model in which age, sex, social environment, and physical factors were all inputted showed that costs for people with one oral function problem were (B=404,000), two oral function problems ( B=477,000), and three oral function problems (B=828,000) more than those with normal oral function.

Table 2. Tobit regression differences in cumulative cost of long-term care insurance services by number of

oral problems

| Explanatory            | Categories    | Crude Model            | Model 1               | Model 2              |
|------------------------|---------------|------------------------|-----------------------|----------------------|
|                        |               | B (95% CI)             | B (95% CI)            | B (95% CI)           |
| Oral function          | normal        | reference              | reference             | reference            |
|                        | one problem   | 10414.23               | 6532.43               | 4040.88              |
|                        |               | (8712.39 to 12116.06)  | (4909.64 to 8155.22)  | (2369.44 to 5712.33) |
|                        | two problem   | 18217.95               | 10028.46              | 4770.79              |
|                        |               | (15986.76 to 20449.15) | (7922.02 to 12134.91) | (2564.31 to 6977.28) |
|                        | three problem | 28416.51               | 17793.12              | 8282.54              |
| (25114.68 to 31718.34) |               | (14699.14 to 20887.10) | (4989.13 to 11575.96) |                      |

Unit: USD 1  $\equiv$  100 JPY

Model 1: adjusting for age, sex

Model 2: further adjusting for activity of daily living, current smoking, depressive symptoms, equivalent income, education, marital status

B: partial regression coefficient, CI: confidence interval

Additionally, according to oral function, the percentages of certification for the need for long-term care and death or displacement are as follows: among those with three problems, 36.8%

1  
2  
3  
4 were certified as needing long-term care, compared to 16.7% for those with preserved oral  
5  
6 function. Death and displacement also occurred in 20.6% of those with three problems  
7  
8 compared to 9.1% of those with preserved oral function. The number of days to certification  
9  
10 for the need for long-term care and death or relocation also decreased with the number of oral  
11  
12 function problems.  
13  
14  
15  
16  
17  
18  
19  
20  
21

## 22 **Discussion**

23  
24 This study is the first to examine the differences between the degree of oral function and  
25  
26 subsequent cumulative LTCI costs. In examining cumulative LTCI costs over six years, our  
27  
28 results indicated that cumulative LTCI costs were higher for those with oral function problems  
29  
30 compared to those with maintained oral function. A difference of 4000 to 8200 USD in  
31  
32 cumulative LTCI costs over six years was observed between those with maintained oral  
33  
34 function and those with oral function problems. Further, more oral function problems were  
35  
36 associated with higher future LTCI costs.  
37  
38  
39  
40  
41  
42  
43

44 Table 1 shows that physical factors such as a decline in ADL and depression, as well as  
45  
46 socioeconomic background such as equivalent income and years of education, were also  
47  
48 associated with the cost of care. In terms of environmental factors, costs were higher in marital  
49  
50 status for those who were not married. Further, women were more likely to be in the higher  
51  
52 cost group than men. This is consistent with the report that 34.0% of caregivers were male,[1]  
53  
54 indicating that women use more services when they require care, which also indicates a  
55  
56 problem in the caregiving environment.  
57  
58  
59  
60



1  
2  
3  
4  
5  
6  
7 An analysis of the degree of oral function and 6-year cumulative LTCI costs in Table 2 shows  
8 a difference in cumulative LTCI costs for those with declining oral function compared with  
9 maintained oral function. As a mechanism for this, an association between physical function  
10 and oral health has been reported in older people with impaired oral function. The number of  
11 chewable foods and bite strength has been associated with leg extension power and time spent  
12 standing on one leg,[22,23] and the risk of falling is 2.5 times higher among those with 19 or  
13 fewer teeth compared to those with 20 or more teeth.[24]  
14  
15  
16  
17  
18  
19  
20  
21  
22  
23  
24  
25

26 Oral function is also associated with mental function and dementia. Poor quality of life related  
27 to oral hygiene increases the risk of depressive symptoms among older people.[25] In terms of  
28 cognitive function, those with few teeth and no dentures have a 1.9 times higher likelihood of  
29 having dementia than those with 20 or more teeth.[26] Severe periodontitis, a possible cause  
30 of tooth loss, is associated with MCI.[27] As retained teeth decrease, the number of occlusal  
31 surfaces decreases. Low occlusal contact and consumption of soft foods are risk factors for  
32 Alzheimer's disease.[28] Regarding the association between frailty and oral function, older  
33 patients with frailty have significantly reduced oral function, which is associated with lower  
34 occlusal force, masseter muscle thickness, and oral diadochokinesis rate.[29] A study on older  
35 people in Japan demonstrated that the risk of requiring long-term care is frail.[30] From these  
36 findings, it can be inferred that a decline in oral function is closely related to physical, mental,  
37 and cognitive function and is a factor in the development of the need for long-term care. The  
38 risk of needing long-term care and certification as requiring long-term care are assumed to be  
39 associated with the use of long-term care services and thus, with the cumulative cost of LTCI  
40 costs.  
41  
42  
43  
44  
45  
46  
47  
48  
49  
50  
51  
52  
53  
54  
55  
56  
57  
58  
59  
60

1  
2  
3  
4 However, in a previous study similarly examining the association with cumulative LTCI costs,  
5  
6 cumulative LTCI costs were 600 USD higher over 6 years (100 USD per year) for those who  
7  
8 were less physically active than for those who were less physically active.[31] In addition,  
9  
10 caregiving costs were 1200 USD lower over 6 years (200 USD per year) for those who  
11  
12 participated in social activities such as hobbies and sports groups compared to those who did  
13  
14 not.[32] These are certainly reasonable explanations for the results indicating an association of  
15  
16 high cost with oral function decline, which is a risk of needing care, and high cost with oral  
17  
18 function decline, which was 4000 to 8200 USD over 6 years (670 to 1360 USD per year) for  
19  
20 those whose function declined compared to those whose oral function was maintained in the  
21  
22 present study.  
23  
24  
25  
26  
27  
28  
29

30 In Table 2, the analysis was based on the number of oral function problems. For each increase  
31  
32 in oral function problems, there was an increase in cost. The cost per beneficiary per year in  
33  
34 2020 for the elderly in Japan was 2.09 million USD.[33] For those with one oral function  
35  
36 problem, it was equivalent to 19.3% of the total, 22.7% for those with two, and 39.5% for those  
37  
38 with three. However, oral function affected the cost of long-term care services, when the  
39  
40 cumulative long-term care costs during the follow-up period were analyzed. People with good  
41  
42 oral function may have a shorter duration of need for long-term care during the follow-up  
43  
44 period (Table 3).  
45  
46  
47

48 Table 3. Rate of those certified as requiring long-term care and mortality and days by the oral problem  
49

| Oral function | Requiring long-term care |          |                                  | Mortality |         |                               |
|---------------|--------------------------|----------|----------------------------------|-----------|---------|-------------------------------|
|               | n                        | (%)      | First time days to certification | n         | (%)     | Days to death or displacement |
| Normal        | 3081                     | (16.70%) | 1928.77                          | 1674      | (9.10%) | 2024.14                       |

|                |              |         |              |         |
|----------------|--------------|---------|--------------|---------|
| One problem    | 2167(22.40%) | 1874.07 | 1214(12.60%) | 1987.63 |
| Two problems   | 1148(29.30%) | 1814.63 | 636 (16.20%) | 1945.89 |
| Three problems | 484 (36.80%) | 1725.16 | 271 (20.60%) | 1891.41 |
| total          | 6880(20.70%) | 1799.69 | 3795(11.40%) | 1943.58 |

---

The percentage of the number of problems for each oral function.

Previous studies related to eating difficulties have also reported that fewer teeth and denture use are associated with mortality[34,35] and fewer foods can be chewed by those who require nursing care.[22] Self-reported surveys have reported that mastication disorders are associated with an increased risk of mortality among older persons.[36] In a study related to oral dryness, it was reported that lip strength and lip dexterity are decreased in persons requiring nursing care,[37] and weak lip strength is also associated with oral dryness as is the length of time spent opening the mouth. Dysphagia is associated with frailty.[38,39] Increased problems with oral function increase the need for nursing care and the risk of death, which can have a serious impact on the health status of older adults with poor oral function, consistent with previous research on the need to provide effective oral health care and reduce the burden of oral disease, as well as its impact on general health.[40]

In this study, chewing hard food, choking, and thirst were evaluated. It is desirable to maintain these functions to reduce the future cost of care. It has been reported that bite and chewing strength related to difficulty in chewing hard foods, hyoid muscle related to swallowing, and xerostomia can be improved by functional training.[41-46] For patients with oral problems, early professional care and efforts to maintain oral function may help control future LTCI costs. Since oral function deterioration can also lead to dysphagia, it is hoped that in the future this will lead to a reduction in deaths from aspiration pneumonia, the leading cause of death in Japan.[24]

1  
2  
3  
4 Based on these results, we attempted to estimate the total cost savings in Japanese LTCI if this  
5  
6 goal were achieved; 18.9% of all people in Table 1 had two or more oral problems. The  
7  
8 difference in cumulative LTCI costs would be 477,000 for two functional declines or 795,000  
9  
10 per year. Applying the results of this study, in a community of 10,000 seniors, 1,890 seniors  
11  
12 would have oral function impairment. If oral function improves, the cumulative cost of long-  
13  
14 term care will be reduced by 150.25 million USD per year. In addition, 76.8% of those with  
15  
16 oral dysfunction did not use long-term care services, even though they had oral dysfunction.  
17  
18 Preventive intervention for those with oral function loss who are not using services will prevent  
19  
20 the risk of further functional decline and serious illness in the future.  
21  
22  
23  
24

### 25 **Strengths**

26  
27 The strength of this study is that we analyzed merged individual data from questionnaires on  
28  
29 social life and public claim records as they pertain to long-term care services. More  
30  
31 specifically, we used a large-scale dataset involving data from numerous municipalities.  
32  
33  
34

### 35 **Limitations**

36  
37 There are five limitations of this study. First, because this is a questionnaire survey, it does not  
38  
39 capture the entire population of older people living at home. In addition, those who were able  
40  
41 to respond to both the baseline and follow-up surveys may have consisted of healthy  
42  
43 individuals. Measurement bias may have occurred. Second, the data in this study consisted of  
44  
45 surveys conducted at the municipal level, where cooperation was obtained, and selection bias  
46  
47 may exist. The data are biased due to a valid response rate of 64.7%. Third, the follow-up  
48  
49 period was only 6 years, which is too short to reflect the lifetime cost of care. Future studies  
50  
51 should incorporate a longer follow-up period. Fourth, the data are not adjusted for diseases.  
52  
53 There may be confounding factors that were not taken into account in the analyses in this study.  
54  
55  
56  
57  
58  
59 Fifth, our data did not take into account the type of health care services used. Depending on  
60

1  
2  
3  
4 the services used, the patient may already be receiving professional care related to oral organ  
5  
6 function. Future surveys should also analyze by type of service.  
7

## 8 9 **Conclusions**

10  
11 The degree of oral function in older people was associated with cumulative LTCI costs. There  
12  
13 was a difference in cumulative LTCI costs between those with preserved oral function and  
14  
15 those with declining oral function. Compared to those whose oral function was maintained,  
16  
17 those with oral function problems had approximately 4000 to 8000 USD lower cumulative  
18  
19 LTCI costs over six years. The more oral function problems, the larger the difference.  
20  
21 Maintaining the oral functions of older people may lead to a reduction in future accumulated  
22  
23 LTCI costs.  
24  
25  
26  
27  
28  
29  
30

## 31 **Acknowledgments**

32  
33 This study used data from the Japan Gerontological Evaluation Study (JAGES), conducted by  
34  
35 the Center for Well-being and Society, Nihon Fukushi University, as one of their research  
36  
37 projects. Editorial support in the form of medical writing was obtained from Editage.  
38  
39  
40  
41  
42  
43  
44

## 45 **Author contribution**

46  
47 All authors contributed to the conception and design of this study. Data collection was  
48  
49 primarily conducted by MS, YM, EO, and TO. Analyses were performed by KK and supported  
50  
51 by MS, YM, EO, and TO. KK prepared the initial manuscript and MS, YM, EO, and TO  
52  
53 significantly contributed to revising it. All authors read and approved the final manuscript.  
54  
55  
56  
57  
58  
59  
60

## Funding

This study was supported by the Japan Society for the Promotion of Science (JSPS) KAKENHI (18H00953) and the Japan Agency for Medical Research and Development (AMED) (19dk0110037h0001) and the Health Labour Sciences Research Grant (21LA1003) .

The baseline survey was conducted by the Japan Gerontological Evaluation Study (JAGES). This survey was supported by JSPS KAKENHI (20H00557, JP15H01972, 21K17303), a Health Labour Sciences Research Grant (H28-Choju-Ippan-002), AMED (JP20dk0110034, JP17dk0110017, JP18dk0110027, JP18ls0110002, JP18le0110009, JP19dk0110034, and JP19dk0110037), Open Innovation Platform with Enterprises, Research Institute and Academia (OPERA, JPMJOP1831) from the Japan Science and Technology (JST), a grant from the Innovative Research Program on Suicide Countermeasures (1–4), a grant from the Sasakawa Sports Foundation, a grant from the Japan Health Promotion & Fitness Foundation, a grant from the Chiba Foundation for Health Promotion & Disease Prevention, the 8020 Research Grant for the fiscal year of 2019 from the 8020 Promotion Foundation (19-2-06), a grant from Niimi University (1915010), grants from the Meiji Yasuda Life Foundation of Health and Welfare, and Research Funding for Longevity Sciences from the National Center for Geriatrics and Gerontology (20-19, 29-42, 30-22). The funders had no role in study.

## Disclaimer

The views and opinions expressed in this article are those of the authors and do not necessarily reflect the official policy or position of the respective funding organisations.

## Conflicts of interest

The authors have no competing interests to declare.

## Patient consent for publication

1  
2  
3  
4 Not required.  
5  
6

7 **Institutional review board statement**  
8

9  
10 This study was approved by the Ethics Committee on the Research of Human Subjects at Nihon  
11  
12 Fukushima University (no. 10-05). This study was conducted through a collaborative research  
13  
14 agreement with the associated municipalities. JAGES participants were informed that  
15  
16 participation in the study was voluntary and that completing and returning the questionnaire  
17  
18 via mail indicated their consent to participate in the study. We obtained written informed  
19  
20 consent from the participants.  
21  
22

23  
24 **Provenance and peer review**  
25

26  
27 Not commissioned; externally peer reviewed. Data availability statement Data are available  
28  
29 upon reasonable request.  
30  
31

32 **Data availability statement**  
33

34  
35 Data are not open for public due to ethical concerns. Data are from the JAGES study whose  
36  
37 authors may be contacted at data management committee: [dataadmin@jages.net](mailto:dataadmin@jages.net). The data set  
38  
39 has ethical or legal restrictions because it includes human participants.  
40  
41  
42  
43  
44  
45  
46  
47  
48  
49  
50  
51  
52  
53  
54  
55  
56  
57  
58  
59  
60

## References

- 1 Cabinet Office, Government of Japan, *Chapter 1. Aging situation*.  
[https://www8.cao.go.jp/kourei/whitepaper/w-2018/html/zenbun/s1\\_2\\_2.html](https://www8.cao.go.jp/kourei/whitepaper/w-2018/html/zenbun/s1_2_2.html). In: *White paper on aging society* 2018.
- 2 Ministry of Health, Labour and Welfare. *Long-term care insurance business status report*.  
<https://www.mhlw.go.jp/topics/kaigo/osirase/jigyo/19/index.html> 2019a.
- 3 Ministry of Health, Labour and Welfare. Overview of national medical expenses.  
<https://www.mhlw.go.jp/toukei/saikin/hw/k-iryohi/13/index.html> 2015.
- 4 Statistics Bureau of Japan. Population estimation.  
<https://www.stat.go.jp/english/data/jinsui/tsuki/index.html> 2022.
- 5 Ministry of Health, Labour and Welfare. About the first long-term care insurance premium and expected service amount, *etc.* during the 8th long-term care insurance business plan period. *Overview of 2020 statistics on actual conditions of long-term care costs*. [original in Japanese]. (Accessed 14 Jun 2022).  
<https://www.mhlw.go.jp/toukei/saikin/hw/kaigo/kyufu/20/index.html>.
- 6 Murakami M, Hirano H, Watanabe Y, et al. Relationship between chewing ability and sarcopenia in Japanese community-dwelling older adults. *Geriatr Gerontol Int* 2015;15:1007–12. <https://doi.org/10.1111/ggi.12399>.
- 7 Bässler R. Histopathology of different types of atrophy of the human tongue. *Pathol Res Pract* 1987;182:87–97. [https://doi.org/10.1016/S0344-0338\(87\)80147-4](https://doi.org/10.1016/S0344-0338(87)80147-4).
- 8 Chen LK, Liu LK, Woo J et al. Sarcopenia in Asia: consensus report of the Asian Working Group for Sarcopenia. *J Am Med Dir Assoc* 2014;15:95–101.  
<https://doi.org/10.1016/j.jamda.2013.11.025>.
- 9 Fujishima I, Fujiu-Kurachi M, Arai H et al. Sarcopenia and dysphagia: position paper by four professional organizations. *Geriatr Gerontol Int* 2019;19:91–7.



- 1  
2  
3  
4 <https://doi.org/10.1111/ggi.13591>.
- 5  
6 10 Serra-Prat M, Palomera M, Gomez C et al. Oropharyngeal dysphagia as a risk factor for  
7  
8 malnutrition and lower respiratory tract infection in independently living older persons: a  
9  
10 population-based prospective study. *Age Ageing* 2012;41:376–81.  
11  
12 <https://doi.org/10.1093/ageing/afs006>.
- 13  
14 11 Tanaka T, Takahashi K, Hirano H et al. Oral frailty as a risk factor for physical frailty and  
15  
16 mortality in community-dwelling elderly. *J Gerontol A Biol Sci Med Sci* 2018;73:1661–7.
- 17  
18 12 Thompson B, Cooney P, Lawrence H et al. The potential oral health impact of cost barriers to  
19  
20 dental care: findings from a Canadian population-based study. *BMC Oral Health* 2014;14:78.  
21  
22 <https://doi.org/10.1186/1472-6831-14-78>.
- 23  
24 13 Nomura Y, Sato T, Kamoshida Y et al. Prediction of health care costs by dental health care  
25  
26 costs and periodontal status. *Appl Sci* 2020;10:3140. <https://doi.org/10.3390/app10093140>.
- 27  
28 14 Münzenmayer MA, Mariño R, Hsueh A. Cost-effectiveness of professional oral health care in  
29  
30 Australian residential aged care facilities. *Gerodontology* 2019;36:107–17.  
31  
32 <https://doi.org/10.1111/ger.12386>.
- 33  
34 15 World Health Organization Centre for Health development. *Knowledge translation for healthy*  
35  
36 *ageing: the Japan Gerontological Evaluation Study (JAGES)*.  
37  
38 [https://extranet.who.int/kobe\\_centre/en/project-details/knowledge-translation-healthy-ageing-](https://extranet.who.int/kobe_centre/en/project-details/knowledge-translation-healthy-ageing-japan-gerontological-evaluation-study-jages)  
39  
40 [japan-gerontological-evaluation-study-jages](https://extranet.who.int/kobe_centre/en/project-details/knowledge-translation-healthy-ageing-japan-gerontological-evaluation-study-jages) 2018.
- 41  
42 16 Japanese Ministry of Health, Labour and Welfare. The basic checklist.  
43  
44 <http://www.mhlw.go.jp/topics/kaigo/kaigi/051219/dl/2.pdf>. (in Japanese) April 2016.
- 45  
46 17 Kamegaya T, Yamaguchi H, Hayashi K. Evaluation by the basic checklist and the risk of 3  
47  
48 years incident long-term care insurance certification. *J Gen Fam Med* 2017;18:230–6.  
49  
50 <https://doi.org/10.1002/jgf2.52>.
- 51  
52 18 Fukutomi E, Okumiya K, Wada T et al. Importance of cognitive assessment as part of the  
53  
54  
55  
56  
57  
58  
59  
60

- 1  
2  
3  
4 “KihonChecklist” developed by the Japanese Ministry of Health, Labor and Welfare for  
5 prediction of frailty at a 2-year follow up. *Geriatr Gerontol Int* 2013;13:654–62.  
6  
7 <https://doi.org/10.1111/j.1447-0594.2012.00959.x>.  
8  
9
- 10 19 Yesavage JA, Brink TL, Rose TL et al. Development and validation of a geriatric depression  
11 screening scale: a preliminary report. *J Psychiatr Res* 1982-1983;17:37–49.  
12  
13 [https://doi.org/10.1016/0022-3956\(82\)90033-4](https://doi.org/10.1016/0022-3956(82)90033-4).  
14  
15
- 16 20 Tobin J. Estimation of relationships for limited dependent variables. *Econometrica*  
17 1958;26:24–36. <https://doi.org/10.2307/1907382>.  
18  
19
- 20 21 Amemiya T. *Advanced econometrics*. Harvard University Press 1985.  
21  
22
- 23 22 Ansai T, Takata Y, Soh I et al. Relationship between chewing ability and 4-year mortality in a  
24 cohort of 80-year-old Japanese people. *Oral Dis* 2007;13:214–9.  
25  
26 <https://doi.org/10.1111/j.1601-0825.2006.01269.x>.  
27  
28
- 29 23 Yamaga T, Yoshihara A, Ando Y et al. Relationship between dental occlusion and physical  
30 fitness in an elderly population. *J Gerontol A Biol Sci Med Sci* 2002;57:M616–20.  
31  
32 <https://doi.org/10.1093/gerona/57.9.m616>.  
33  
34
- 35 24 Yamamoto T, Kondo K, Misawa J et al. Dental status and incident falls among older Japanese:  
36 A prospective cohort study. *BMJ Open* 2012;2:e001262. <https://doi.org/10.1136/bmjopen-2012-001262>.  
37  
38  
39
- 40 25 Rouxel P, Tsakos G, Chandola T et al. Oral Health-A neglected aspect of subjective well-being  
41 in later life. *J Gerontol B Psychol Sci Soc Sci* 2018;73:382–6.  
42  
43
- 44 26 Aida J, Kondo K, Hirai H et al. Association between dental status and incident disability in an  
45 older Japanese population. *J Am Geriatr Soc* 2012;60:338–43. <https://doi.org/10.1111/j.1532-5415.2011.03791.x>.  
46  
47  
48
- 49 27 Iwasaki M, Kimura Y, Ogawa H et al. Periodontitis, periodontal inflammation, and mild  
50 cognitive impairment: A 5-year cohort study. *J Periodontal Res* 2019;54:233–40.  
51  
52  
53  
54  
55  
56  
57  
58  
59  
60

- 1  
2  
3  
4 <https://doi.org/10.1111/jre.12623>.
- 5  
6 28 Popovac A, Čelebić A, Peršić S et al. Oral Health status and nutritional habits as predictors for  
7  
8 developing Alzheimer's disease. *Med Princ Pract* 2021;30:448–54.  
9  
10 <https://doi.org/10.1159/000518258>.
- 11  
12  
13 29 Watanabe Y, Hirano H, Arai H et al. Relationship between frailty and oral function in  
14  
15 community-dwelling elderly adults. *J Am Geriatr Soc* 2017;65:66–76.  
16  
17 <https://doi.org/10.1111/jgs.14355>.
- 18  
19  
20 30 Kitamura A, Seino S, Taniguchi Y et al.. Impact of lifestyle-related diseases and frailty on the  
21  
22 incidence of loss of independence in Japanese community-dwelling older adults: A  
23  
24 Longitudinal Study on Aging and Health in Kusatsu. *Nihon Koshu Eisei Zasshi* 2020;67:134–  
25  
26 45. [https://doi.org/10.11236/jph.67.2\\_134](https://doi.org/10.11236/jph.67.2_134).
- 27  
28  
29 31 Hirai H, Saito M, Kondo N et al. Physical activity and cumulative long-term care cost among  
30  
31 older Japanese adults: a prospective study in JAGES. *Int J Environ Res Public Health*  
32  
33 2021;18:5004. <https://doi.org/10.3390/ijerph18095004>.
- 34  
35  
36 32 Saito M, Kondo N, Aida J et al. Differences in cumulative long-term care costs by community  
37  
38 activities and employment: A prospective follow-up study of older Japanese adults. *Int J*  
39  
40 *Environ Res Public Health* 2021;18:5414.
- 41  
42  
43 33 Ministry of Health, Labour and Welfare. Long-term care, health and welfare services for the  
44  
45 elderly, statistics on care costs at 2020.  
46  
47 <https://www.mhlw.go.jp/toukei/saikin/hw/kaigo/kyufu/18/dl/03.pdf>.
- 48  
49  
50 34 Fukai K, Takiguchi T, Ando Y et al. Mortality rates of community-residing adults with and  
51  
52 without dentures. *Geriatr Gerontol Int* 2008;8:152–9. [https://doi.org/10.1111/j.1447-](https://doi.org/10.1111/j.1447-0594.2008.00464.x)  
53  
54 [0594.2008.00464.x](https://doi.org/10.1111/j.1447-0594.2008.00464.x).
- 55  
56  
57 35 Yoshida M, Morikawa H, Yoshikawa M et al. Eight-year mortality associated with dental  
58  
59 occlusion and denture use in community-dwelling elderly persons. *Gerodontology*  
60

2005;22:234–7. PMID: [16329232](https://pubmed.ncbi.nlm.nih.gov/16329232/).

36 Nakanishi N, Fukuda H, Takatorige T et al. Relationship between self-assessed masticatory disability and 9-year mortality in a cohort of community-residing elderly people.

*J Am Geriatr Soc* 2005;53:54–8. <https://doi.org/10.1111/j.1532-5415.2005.53010.x>.

37 Tamura F, Fukui T, Kikutani T et al. Lip-closing function of elderly people during ingestion: comparison with young adults. *Int J Orofacial Myology* 2009;35:33–43.

<https://doi.org/10.52010/ijom.2009.35.1.3>.

38 Yang RY, Yang AY, Chen YC et al. Association between dysphagia and frailty in older adults: a systematic review and meta-analysis. *Nutrients* 2022;14:1812.

<https://doi.org/10.3390/nu14091812>.

39 Baijens LW, Clavé P, Cras P et al. European Society for Swallowing Disorders - European Union Geriatric Medicine Society white paper: oropharyngeal dysphagia as a geriatric syndrome. *Clin Interv Aging* 2016;11:1403–28.

<https://doi.org/10.2147/CIA.S107750>.

40 Badewy R, Singh H, Quiñonez C et al. Impact of poor oral health on community-dwelling seniors: a scoping review. *Health Serv Insights* 2021;14:1178632921989734.

<https://doi.org/10.1177/1178632921989734>.

41 Ibayashi H, Fujino Y, Pham TM et al. Intervention study of exercise program for oral function in healthy elderly people. *Tohoku J Exp Med* 2008;215:237–45.

<https://doi.org/10.1620/tjem.215.237>.

42 Sakayori T, Maki Y, Ohkubo M et al. Longitudinal evaluation of community support project to improve oral function in Japanese elderly. *Bull Tokyo Dent Coll* 2016;57:75–82.

<https://doi.org/10.2209/tdcpublish.2015-0035>.

43 Sakayori T, Maki Y, Hirata S et al. Evaluation of a Japanese “Prevention of long-term care” project for the improvement in oral function in the high-risk elderly. *Geriatr Gerontol*

1  
2  
3  
4 *Int* 2013;13:451–7. <https://doi.org/10.1111/j.1447-0594.2012.00930.x>.

5  
6 44 Hakuta C, Mori C, Ueno M et al. Evaluation of an oral function promotion programme  
7  
8 for the independent elderly in Japan. *Gerodontology* 2009;26:250–8.  
9  
10 <https://doi.org/10.1111/j.1741-2358.2008.00269.x>.

11  
12 45 Ohara Y, Yoshida N, Kono Y et al. Effectiveness of an oral health educational  
13  
14 program on community-dwelling older people with xerostomia. *Geriatr Gerontol Int*  
15  
16 2015;15:481–9. <https://doi.org/10.1111/ggi.12301>.

17  
18 46 Easterling C. Does an exercise aimed at improving swallow function have an effect  
19  
20 on vocal function in the healthy elderly? *Dysphagia* 2008;23:317–26.  
21  
22 <https://doi.org/10.1007/s00455-008-9158-z>.

## STROBE Statement—checklist of items that should be included in reports of observational studies

|                              | Item No | Recommendation                                                                                                                                                                                                                                                                                                                                                                                                                                                                 | Page No |
|------------------------------|---------|--------------------------------------------------------------------------------------------------------------------------------------------------------------------------------------------------------------------------------------------------------------------------------------------------------------------------------------------------------------------------------------------------------------------------------------------------------------------------------|---------|
| <b>Title and abstract</b>    | 1       | (a) Indicate the study's design with a commonly used term in the title or the abstract                                                                                                                                                                                                                                                                                                                                                                                         | 2       |
|                              |         | (b) Provide in the abstract an informative and balanced summary of what was done and what was found                                                                                                                                                                                                                                                                                                                                                                            | 3       |
| <b>Introduction</b>          |         |                                                                                                                                                                                                                                                                                                                                                                                                                                                                                |         |
| Background/rationale         | 2       | Explain the scientific background and rationale for the investigation being reported                                                                                                                                                                                                                                                                                                                                                                                           | 5       |
| Objectives                   | 3       | State specific objectives, including any prespecified hypotheses                                                                                                                                                                                                                                                                                                                                                                                                               | 5       |
| <b>Methods</b>               |         |                                                                                                                                                                                                                                                                                                                                                                                                                                                                                |         |
| Study design                 | 4       | Present key elements of study design early in the paper                                                                                                                                                                                                                                                                                                                                                                                                                        | 6       |
| Setting                      | 5       | Describe the setting, locations, and relevant dates, including periods of recruitment, exposure, follow-up, and data collection                                                                                                                                                                                                                                                                                                                                                | 6       |
| Participants                 | 6       | (a) <i>Cohort study</i> —Give the eligibility criteria, and the sources and methods of selection of participants. Describe methods of follow-up<br><br><i>Case-control study</i> —Give the eligibility criteria, and the sources and methods of case ascertainment and control selection. Give the rationale for the choice of cases and controls<br><br><i>Cross-sectional study</i> —Give the eligibility criteria, and the sources and methods of selection of participants | 6,7     |
|                              |         | (b) <i>Cohort study</i> —For matched studies, give matching criteria and number of exposed and unexposed<br><br><i>Case-control study</i> —For matched studies, give matching criteria and the number of controls per case                                                                                                                                                                                                                                                     |         |
| Variables                    | 7       | Clearly define all outcomes, exposures, predictors, potential confounders, and effect modifiers. Give diagnostic criteria, if applicable                                                                                                                                                                                                                                                                                                                                       | 7       |
| Data sources/<br>measurement | 8*      | For each variable of interest, give sources of data and details of methods of assessment (measurement). Describe comparability of assessment methods if there is more than one group                                                                                                                                                                                                                                                                                           | 7,8     |
| Bias                         | 9       | Describe any efforts to address potential sources of bias                                                                                                                                                                                                                                                                                                                                                                                                                      | 6,7     |
| Study size                   | 10      | Explain how the study size was arrived at                                                                                                                                                                                                                                                                                                                                                                                                                                      | 6,7     |

1  
2  
3  
4  
5  
6  
7  
8  
9  
10  
11  
12  
13  
14  
15  
16  
17  
18  
19  
20  
21  
22  
23  
24  
25  
26  
27  
28  
29  
30  
31  
32  
33  
34  
35  
36  
37  
38  
39  
40  
41  
42  
43  
44  
45  
46  
47  
48  
49  
50  
51  
52  
53  
54  
55  
56  
57  
58  
59  
60

|                                                                                                              |    |                                                                                                                              |       |
|--------------------------------------------------------------------------------------------------------------|----|------------------------------------------------------------------------------------------------------------------------------|-------|
| Quantitative variables                                                                                       | 11 | Explain how quantitative variables were handled in the analyses. If applicable, describe which groupings were chosen and why | 6,7,8 |
| Statistical methods                                                                                          | 12 | (a) Describe all statistical methods, including those used to control for confounding                                        | 9     |
|                                                                                                              |    | (b) Describe any methods used to examine subgroups and interactions                                                          | 9     |
|                                                                                                              |    | (c) Explain how missing data were addressed                                                                                  | 9     |
|                                                                                                              |    | (d) <i>Cohort study</i> —If applicable, explain how loss to follow-up was addressed                                          | 9     |
|                                                                                                              |    | <i>Case-control study</i> —If applicable, explain how matching of cases and controls was addressed                           |       |
| <i>Cross-sectional study</i> —If applicable, describe analytical methods taking account of sampling strategy |    |                                                                                                                              |       |
|                                                                                                              |    | (e) Describe any sensitivity analyses                                                                                        |       |

Continued on next page

For peer review only

1  
2  
3  
4  
5  
6  
7  
8  
9  
10  
11  
12  
13  
14  
15  
16  
17  
18  
19  
20  
21  
22  
23  
24  
25  
26  
27  
28  
29  
30  
31  
32  
33  
34  
35  
36  
37  
38  
39  
40  
41  
42  
43  
44  
45  
46  
47  
48  
49  
50  
51  
52  
53  
54  
55  
56  
57  
58  
59  
60**Results**

|                  |     |                                                                                                                                                                                                              |       |
|------------------|-----|--------------------------------------------------------------------------------------------------------------------------------------------------------------------------------------------------------------|-------|
| Participants     | 13* | (a) Report numbers of individuals at each stage of study—eg numbers potentially eligible, examined for eligibility, confirmed eligible, included in the study, completing follow-up, and analysed            | 10    |
|                  |     | (b) Give reasons for non-participation at each stage                                                                                                                                                         |       |
|                  |     | (c) Consider use of a flow diagram                                                                                                                                                                           |       |
| Descriptive data | 14* | (a) Give characteristics of study participants (eg demographic, clinical, social) and information on exposures and potential confounders                                                                     | 11,12 |
|                  |     | (b) Indicate number of participants with missing data for each variable of interest                                                                                                                          | 11,12 |
|                  |     | (c) <i>Cohort study</i> —Summarise follow-up time (eg, average and total amount)                                                                                                                             | 17    |
| Outcome data     | 15* | <i>Cohort study</i> —Report numbers of outcome events or summary measures over time                                                                                                                          | 13    |
|                  |     | <i>Case-control study</i> —Report numbers in each exposure category, or summary measures of exposure                                                                                                         |       |
|                  |     | <i>Cross-sectional study</i> —Report numbers of outcome events or summary measures                                                                                                                           |       |
| Main results     | 16  | (a) Give unadjusted estimates and, if applicable, confounder-adjusted estimates and their precision (eg, 95% confidence interval). Make clear which confounders were adjusted for and why they were included | 13,14 |
|                  |     | (b) Report category boundaries when continuous variables were categorized                                                                                                                                    |       |
|                  |     | (c) If relevant, consider translating estimates of relative risk into absolute risk for a meaningful time period                                                                                             |       |
| Other analyses   | 17  | Report other analyses done—eg analyses of subgroups and interactions, and sensitivity analyses                                                                                                               | 17    |

**Discussion**

|                  |    |                                                                                                                                                                            |       |
|------------------|----|----------------------------------------------------------------------------------------------------------------------------------------------------------------------------|-------|
| Key results      | 18 | Summarise key results with reference to study objectives                                                                                                                   | 14    |
| Limitations      | 19 | Discuss limitations of the study, taking into account sources of potential bias or imprecision. Discuss both direction and magnitude of any potential bias                 | 15,16 |
| Interpretation   | 20 | Give a cautious overall interpretation of results considering objectives, limitations, multiplicity of analyses, results from similar studies, and other relevant evidence | 16,17 |
| Generalisability | 21 | Discuss the generalisability (external validity) of the study results                                                                                                      | 18    |

**Other information**

|         |    |                                                                                                                                                               |    |
|---------|----|---------------------------------------------------------------------------------------------------------------------------------------------------------------|----|
| Funding | 22 | Give the source of funding and the role of the funders for the present study and, if applicable, for the original study on which the present article is based | 20 |
|---------|----|---------------------------------------------------------------------------------------------------------------------------------------------------------------|----|



1  
2 \*Give information separately for cases and controls in case-control studies and, if applicable, for exposed and  
3 unexposed groups in cohort and cross-sectional studies.  
4  
5  
6

7 **Note:** An Explanation and Elaboration article discusses each checklist item and gives methodological background and  
8 published examples of transparent reporting. The STROBE checklist is best used in conjunction with this article (freely  
9 available on the Web sites of PLoS Medicine at <http://www.plosmedicine.org/>, Annals of Internal Medicine at  
10 <http://www.annals.org/>, and Epidemiology at <http://www.epidem.com/>). Information on the STROBE Initiative is  
11 available at [www.strobe-statement.org](http://www.strobe-statement.org).  
12  
13  
14  
15  
16  
17  
18  
19  
20  
21  
22  
23  
24  
25  
26  
27  
28  
29  
30  
31  
32  
33  
34  
35  
36  
37  
38  
39  
40  
41  
42  
43  
44  
45  
46  
47  
48  
49  
50  
51  
52  
53  
54  
55  
56  
57  
58  
59  
60

For peer review only

# BMJ Open

## Oral function and cumulative long-term care costs among older Japanese adults: A prospective six-year follow-up study of long care receipt data

|                                 |                                                                                                                                                                                                                                                                                                                                                                                                                                                                                                                                                                                                                                                                                            |
|---------------------------------|--------------------------------------------------------------------------------------------------------------------------------------------------------------------------------------------------------------------------------------------------------------------------------------------------------------------------------------------------------------------------------------------------------------------------------------------------------------------------------------------------------------------------------------------------------------------------------------------------------------------------------------------------------------------------------------------|
| Journal:                        | <i>BMJ Open</i>                                                                                                                                                                                                                                                                                                                                                                                                                                                                                                                                                                                                                                                                            |
| Manuscript ID                   | bmjopen-2022-066349.R1                                                                                                                                                                                                                                                                                                                                                                                                                                                                                                                                                                                                                                                                     |
| Article Type:                   | Original research                                                                                                                                                                                                                                                                                                                                                                                                                                                                                                                                                                                                                                                                          |
| Date Submitted by the Author:   | 25-Nov-2022                                                                                                                                                                                                                                                                                                                                                                                                                                                                                                                                                                                                                                                                                |
| Complete List of Authors:       | Kojima, Kaori; Hamamatsu University School of Medicine, Department of Community Health and Preventive Medicine<br>Saito, Masashige; Nihon Fukushi University, Faculty of Social Welfare; Nihon Fukushi University, Center for Well-Being and Society<br>Miyaguni, Yasuhiro; Nihon Fukushi University, Faculty of Social Welfare; National Center for Geriatrics and Gerontology, Center for Gerontology and Social Science<br>Okada, Eisaku; Hosei University, Faculty of Social Policy & Administration; Nihon Fukushi University, Center for Well-Being and Society<br>Ojima, Toshiyuki; Hamamatsu University School of Medicine, Department of Community Health and Preventive Medicine |
| <b>Primary Subject Heading</b>: | Geriatric medicine                                                                                                                                                                                                                                                                                                                                                                                                                                                                                                                                                                                                                                                                         |
| Secondary Subject Heading:      | Health informatics                                                                                                                                                                                                                                                                                                                                                                                                                                                                                                                                                                                                                                                                         |
| Keywords:                       | GERIATRIC MEDICINE, ORAL MEDICINE, PUBLIC HEALTH, Health policy < HEALTH SERVICES ADMINISTRATION & MANAGEMENT                                                                                                                                                                                                                                                                                                                                                                                                                                                                                                                                                                              |
|                                 |                                                                                                                                                                                                                                                                                                                                                                                                                                                                                                                                                                                                                                                                                            |

SCHOLARONE™  
Manuscripts



I, the Submitting Author has the right to grant and does grant on behalf of all authors of the Work (as defined in the below author licence), an exclusive licence and/or a non-exclusive licence for contributions from authors who are: i) UK Crown employees; ii) where BMJ has agreed a CC-BY licence shall apply, and/or iii) in accordance with the terms applicable for US Federal Government officers or employees acting as part of their official duties; on a worldwide, perpetual, irrevocable, royalty-free basis to BMJ Publishing Group Ltd ("BMJ") its licensees and where the relevant Journal is co-owned by BMJ to the co-owners of the Journal, to publish the Work in this journal and any other BMJ products and to exploit all rights, as set out in our [licence](#).

The Submitting Author accepts and understands that any supply made under these terms is made by BMJ to the Submitting Author unless you are acting as an employee on behalf of your employer or a postgraduate student of an affiliated institution which is paying any applicable article publishing charge ("APC") for Open Access articles. Where the Submitting Author wishes to make the Work available on an Open Access basis (and intends to pay the relevant APC), the terms of reuse of such Open Access shall be governed by a Creative Commons licence – details of these licences and which [Creative Commons](#) licence will apply to this Work are set out in our licence referred to above.

Other than as permitted in any relevant BMJ Author's Self Archiving Policies, I confirm this Work has not been accepted for publication elsewhere, is not being considered for publication elsewhere and does not duplicate material already published. I confirm all authors consent to publication of this Work and authorise the granting of this licence.

1  
2  
3  
4 1 **Oral function and cumulative long-term care costs among older Japanese adults: A**  
5  
6 2 **prospective six-year follow-up study of long care receipt data**  
7

8  
9 3 Kaori Kojima MSc<sup>1</sup>, Masashige Saito PhD<sup>2,3</sup>, Yasuhiro Miyaguni PhD<sup>2,4</sup>, Eisaku Okada PhD<sup>5</sup>,  
10  
11 4 Toshiyuki Ojima MD, PhD<sup>1</sup>  
12

13  
14 5 <sup>1</sup> Department of Community Health and Preventive Medicine, Hamamatsu University School  
15  
16 6 of Medicine, 1-20-1 Handayama, Higashi-ku, Hamamatsu city, Shizuoka 431-3192, Japan  
17

18  
19 7 <sup>2</sup> Faculty of Social Welfare, Nihon Fukushi University, Okuda, Mihama-cho, Chita-gun, Aichi  
20  
21 8 470-3295, Japan  
22

23  
24 9 <sup>3</sup> Center for Well-Being and Society, Nihon Fukushi University, 5-22-35 Chiyoda, Naka-ku,  
25  
26 10 Nagoya 460-0012, Japan  
27

28  
29  
30 11 <sup>4</sup> Center for Gerontology and Social Science, National Center for Geriatrics and Gerontology,  
31  
32 12 7-430 Morioka-cho, Obu City, Aichi 474-8511, Japan  
33

34  
35 13 <sup>5</sup> Faculty of Social Policy & Administration, Hosei University, 4342 Aihara, Machida, Tokyo,  
36  
37 14 194-0298, Japan  
38

39  
40  
41 15 **Corresponding author:**

42  
43 16 Toshiyuki Ojima  
44

45  
46 17 Department of Community Health and Preventive Medicine, Hamamatsu University School of  
47  
48 18 Medicine  
49

50  
51 19 1-20-1 Handayama, Higashiku, Hamamatsu, 431-3192, JAPAN  
52

53  
54 20 E-mail [ojima@hama-med.ac.jp](mailto:ojima@hama-med.ac.jp)  
55

56 21 TEL +81-53-435-2333 FAX +81-53-435-2341  
57

1  
2  
3  
4  
5  
6  
7  
8  
9  
10  
11  
12  
13  
14  
15  
16  
17  
18  
19  
20  
21  
22  
23  
24  
25  
26  
27  
28  
29  
30  
31  
32  
33  
34  
35  
36  
37  
38  
39  
40  
41  
42  
43  
44  
45  
46  
47  
48  
49  
50  
51  
52  
53  
54  
55  
56  
57  
58  
59  
60

22 **Word count:**

23 3877 words (excluding title page, abstract, references, figures and tables)

24

25

26

27

28

29

30

31

32

33

34

35

36

37

38

39

40

For peer review only

1  
2  
3  
4 41 **ABSTRACT**

5  
6  
7 42 **Objectives:** This study evaluated the relationship between status of oral function and related  
8  
9 43 long-term care service costs.

10  
11  
12 44 **Design:** This was a prospective six-year follow-up study of a previous survey data.

13  
14  
15 45 **Setting:** The data were obtained from the Japan Gerontological Evaluation Study conducted  
16  
17 46 between 2010 and 2011.

18  
19  
20 47 **Participants:** The participants were functionally independent older adults in 12 municipalities  
21  
22 48 across Japan.

23  
24  
25 49 **Interventions:** Care service benefit costs were tracked over six years using publicly available  
26  
27 50 claims records (n = 46,616) to monitor respondents' cumulative care costs.

28  
29  
30 51 **Primary and secondary outcome measures:** The primary outcome variable was the  
31  
32 52 cumulative cost of long-term care insurance services during the follow-up period. We adjusted  
33  
34 53 for the presence or absence of oral function problems, age, sex, physical function, and  
35  
36 54 socioeconomic and lifestyle background at the time of the baseline survey.

37  
38  
39  
40 55 **Results:** Tobit analysis revealed that, compared to those with no oral function problems,  
41  
42 56 cumulative long-term care service benefit costs for those with one, two, or three oral function  
43  
44 57 problems were approximately 4,000, 47,000, and 82,000 USD respectively, over six years.  
45  
46 58 Compared to those with maintained oral function, there was a maximum difference of  
47  
48 59 approximately 82,000 USD in long-term care service costs for those with oral function  
49  
50 60 problems. With increase in number of oral function problems, there was a concomitant  
51  
52 61 elevation in the cost of long-term care.

53  
54  
55  
56 62 **Conclusions:** Oral function in older people was associated with cumulative long-term care

1  
2  
3  
4 63 insurance costs. The oral function of older people should be maintained to reduce future  
5  
6 64 accumulated long-term care insurance costs. Compared to those with maintained oral function,  
7  
8 65 there was a maximum difference of approximately 82,000 USD in long-term care service costs  
9  
10 66 for those with oral function problems. The cost of long-term care was amplified as oral  
11  
12  
13 67 problems increased.

### 68 **Strengths and limitations**

- 69 • The strength of this study is that it used a large-scale dataset involving data from  
70 numerous municipalities
- 71 • Because this was a questionnaire survey, it did not capture the entire population of older  
72 people living at home
- 73 • Selection bias may exist due to a valid response rate of 64.7%
- 74 • The follow-up period of six years was too short to reflect the lifetime cost of care
- 75 • The data were not adjusted for diseases and did not consider the type of healthcare  
76 service used

77 **Keywords:** oral function, older adults, care cost, long-term care insurance, Japan

## 79 INTRODUCTION

80 Globally, life expectancy is increasing. In Japan, the need for long-term care services is  
81 unrelenting, with constant increase in the number of older people requiring long-term care,  
82 together with lengthening of the period during which care is needed.[1] Of the 35.55 million  
83 insured people aged  $\geq 65$  years, the number of those certified as requiring nursing care or  
84 support was 6.69 million in 2019 with the number continually growing.[2] One in four to five  
85 persons aged  $\geq 65$  years requires long-term care, and the related medical expenses in the fiscal  
86 year 2019 amounted to 270.629 billion USD. Additionally, the total number of long-term care  
87 insurance (LTCI) benefits in 2019 were reported to be 160.63 million, and the cost was 104.567  
88 billion USD.[3]

89 Japan's long-term care insurance system was established in 2000 as a system in which, the  
90 society as a whole supports the care of older adults. This insurance system provides benefits to  
91 those who need nursing care, and supports them by making appropriate services available to  
92 them. It aims to support physical independence, and reduce the burden on family members who  
93 provide care. The long-term care insurance system consists of three parties: the insured, the  
94 insurer, and the long-term care service provider. Municipalities act as insurers who administer  
95 the system, and all citizens aged  $\geq 40$  years are eligible to be insured. An insured person is one  
96 who subscribes to long-term care insurance, and is eligible to receive long-term care services  
97 when he/she is certified as requiring it. If they are using the long-term care insurance system,  
98 and are receiving long-term care services, they pay 10% of the cost at the counter (depending  
99 on income, the co-payment can be up to 30%). The long-term care service provider company  
100 that provides the care services to the insured person, bills the insurer for the service cost, which  
101 the insured person receives from the insurer (municipality), except for the share to be paid by  
102 the insured person at the counter. This long-term care insurance system is financed by public



1  
2  
3  
4 103 funds, and long-term care insurance premiums. In total, the municipality and the insured person  
5  
6 104 pay 50% each, for the long-term care insurance premiums.[4] The number of people insured  
7  
8 105 by LTCI increased by 0.8% compared to that in the previous year. However, according to  
9  
10 106 population estimates, 35.88 million of the 78.2 million people over the age of 40 as of 2019  
11  
12 107 will be aged 65 or older, and the amount of delinquent LTCI premiums is increasing.[5] The  
13  
14 108 insured's LTCI premiums were raised from 58.69 to 60.14 USD in 2021. This is a predicament  
15  
16 109 that will lead to tightening of finances and household budgets.[6]  
17  
18  
19

20 110 In older adults, an association between chewing and oral functions, overall health, physical  
21  
22 111 fitness, and mortality risk has been reported.[7] Additionally, overall muscle strength declines  
23  
24 112 with age. Along with other organs associated with the oral cavity, muscle fiber atrophy occur  
25  
26 113 in the tongue with age.[8] Furthermore, a decrease in overall body muscle mass affects  
27  
28 114 mastication.[7] The decline in physical function due to muscle weakness resulting from a  
29  
30 115 decrease in skeletal muscle mass is referred to as sarcopenia.[9] Poor oral function is associated  
31  
32 116 with physical frailty and sarcopenia. Moreover, sarcopenia is also associated with  
33  
34 117 dysphagia.[10] The decline in eating function in old age is a cause of serious diseases, such as  
35  
36 118 malnutrition, and is closely related to life expectancy.[11]  
37  
38  
39

40  
41 119  
42  
43  
44 120 It is presumed that older adults with decline in oral functions are likely to incur higher nursing  
45  
46 121 care costs due to the greater use of services. Care-need prevention is important to reduce the  
47  
48 122 cost of government LTCI benefits. Particularly, it is necessary to shift the emphasis to  
49  
50 123 prevention for those who require light nursing care. Oral frailty[12] has been investigated  
51  
52 124 recently, and evidence suggests that maintaining function from an early stage will help  
53  
54 125 maintain oral function and, in the long run, prevent a decline in feeding and swallowing  
55  
56  
57

1  
2  
3  
4 126 function.[13]  
5

6  
7 127 The association between oral function and health care costs has been reported.[14-16]  
8  
9 128 However, there are currently no reports on the cumulative cost of LTCI. This study aimed to  
10  
11 129 elucidate the association between oral function and LTCI costs among older people based on  
12  
13 130 claim records, through a questionnaire survey conducted among Japanese older adults living  
14  
15 131 in several municipalities.  
16  
17  
18  
19 132

## 20 21 133 **METHODS**

### 22 23 24 134 **Study sample**

25  
26  
27 135 The baseline population data were acquired from a self-reported questionnaire survey of  
28  
29 136 community-dwelling people aged  $\geq 65$  years, with no physical or cognitive disabilities, and not  
30  
31 137 receiving long-term care. Our data were derived from the Japan Gerontological Evaluation  
32  
33 138 Study (JAGES).[17,18] At the time of the baseline survey, respondents were not certified as  
34  
35 139 needing long-term care. As such, respondents resided in the community. The JAGES survey  
36  
37 140 was done by collecting self-administered questionnaires, which were mailed to a random  
38  
39 141 sample of functionally independent individuals aged  $\geq 65$  years, from 12 participating  
40  
41 142 municipalities between August 2010 and January 2012. In total, 51,302 responses were  
42  
43 143 received (valid response rate: 64.7%) and unknown sex and age was excluded. The study  
44  
45 144 population was limited to older adults who were not certified as needing long-term care at the  
46  
47 145 time of the survey; it was combined with the actual long-term care insurance benefits held by  
48  
49 146 the government six years later. We obtained claim records from a governmental database  
50  
51 147 regarding public LTCI benefits over a period of six years for every month from the baseline  
52  
53 148 survey. To ascertain the respondents' subsequent use of LTCIs, information on the actual  
54  
55  
56  
57  
58  
59  
60

1  
2  
3  
4 149 insurance benefits provided by insurers, data on the certification of long-term care needs held  
5  
6 150 by insurers, deaths, and information on the imposition of LTCI premiums were collected in  
7  
8 151 encrypted forms by the insurers. The provided data and questionnaire survey data were  
9  
10 152 matched on an individual basis by the researcher based on the encrypted IDs to create a cohort  
11  
12  
13 153 data set for analysis. A total of 46,616 individuals (90.9% follow-up rate), excluding  
14  
15 154 untraceable cases including in-migrants and out-migrants were included in the analysis.  
16  
17

18 155

### 21 156 **Outcome variables**

22  
23  
24 157 The outcome variable was the cumulative cost of LTCI services during the follow-up period.  
25  
26 158 Information regarding LTCI costs, or deaths was collected from the municipalities. In this  
27  
28 159 analysis, we used the cumulative total of all service costs used during the follow-up period and  
29  
30 160 all The costs for those who never received certification of need for assistance or care during  
31  
32 161 the follow-up period, and those who died without using long-term care insurance services were  
33  
34  
35 162 zero. Information regarding long-term care costs was ascertained based on the number-of-use  
36  
37 163 points in the LTCI costs performance information, which was incorporated from the month the  
38  
39 164 questionnaire survey was administered through November 2016. LTCI costs were ascertained  
40  
41 165 for long-term care services using a similar follow-up period from August 2010 to November  
42  
43  
44 166 2016.  
45  
46

47 167 Since the use of long-term care services is expected to be seasonally skewed, the analysis used  
48  
49 168 a cumulative total of all service costs used during the follow-up period. The long-term care  
50  
51 169 costs handled in this analysis are LTCI costs. The public LTCI do not include the cost of self-  
52  
53 170 paid long-term care services not listed in the information on actual long-term care insurance  
54  
55  
56 171 services. Costs for the purchase of welfare equipment and home modification were also not  
57  
58  
59  
60

1  
2  
3  
4 172 included. The independent variable was the cumulative cost of LTCI benefits over six years.  
5  
6 173 The respondents were divided into two groups based on cumulative costs: 0 USD, and more  
7  
8 174 USD. We used a currency exchange rate of JPY 100 to USD 1.  
9  
10  
11 175

### 14 176 **Explanatory variables**

17 177 Explanatory variables were those related to oral function at the time of the baseline survey. In  
18  
19 178 Japan, to assess whether a person is eligible for nursing care prevention services or LTCI  
20  
21 179 services, use of the Kihon Checklist (KCL) has been recommended by the Ministry of Health,  
22  
23 180 Labour and Welfare.[19] The KCL was created by the Ministry of Health, Labour and Welfare  
24  
25 181 in Japan to help people aged  $\geq 65$  years reflect on their lives and health status and check for  
26  
27 182 any decline in their physical or mental functions [20]. It is used by the local governments, and  
28  
29 183 in community consultations to screen for persons eligible for long-term care prevention  
30  
31 184 programs, and to assess the effectiveness of interventions. The KCL was automatically sent to  
32  
33 185 all individuals  $\geq 65$  years on an annual basis up until 2014, but is now administered at the  
34  
35 186 discretion of each local administration [21].  
36  
37 187 The self-administered questionnaire consists of 25 questions on daily living, physical, and  
38  
39 188 mental functions which are answered with "yes" or "no" responses: five items each to evaluate  
40  
41 189 activities related to daily living motor functions, and physical and mental functions; three items  
42  
43 190 each to evaluate oral functions and cognitive functions; and two items each to evaluate low  
44  
45 191 nutritional status and seclusion. The questionnaire group consists of questions in seven areas  
46  
47 192 of depressive mood assessment. For each question, one point is added when a problem in daily  
48  
49 193 functioning is considered to exist, and the higher the score, the more problems in daily  
50  
51 194 functioning get recorded.[22] The following three items related to oral function were used in  
52  
53  
54  
55  
56  
57  
58  
59  
60

1  
2  
3  
4 195 this survey: “Do you find chewing hard food more difficult compared to half a year earlier?  
5  
6 196 Have you ever choked on tea or soup? Are you bothered by a feeling of thirst?” A response of  
7  
8 197 yes to two or more of these was considered poor oral function and one yes or none was  
9  
10 198 considered normal.[23,24]

### 13 199 **Covariates**

16 200 Sex, age, educational attainment, household equivalized income, and marital status at the time  
17  
18 201 of the baseline survey were used as basic attributes to be considered when examining the  
19  
20 202 association with the use of long-term care services. Regarding demographic attributes, age was  
21  
22 203 divided into five groups: 65–69, 70–74, 75–79, 80–84, and  $\geq 85$  years, socioeconomic  
23  
24 204 background was categorized per household equivalized income (<2 million, 2–4 million,  $\geq 4$   
25  
26 205 million USD). Household equivalized income was calculated by dividing the total income of  
27  
28 206 the entire household by the square root of the number of household members. Educational  
29  
30 207 attainment was assessed by <9, 9–12, >13 years of schooling. Life background, including  
31  
32 208 marital status, was categorized as currently married, or as not married. Household composition  
33  
34 209 was classified as, yes or no with or without a cohabitant. Geriatric Depression Rating Scale  
35  
36 210 (GDS),[25] activities of daily living (ADL), and smoking status were used as indicators of  
37  
38 211 health status. The 15-item Geriatric Depression Scale (0–4 no depression, 5–10 mild  
39  
40 212 depression, and 11–15 severe depression) was used to evaluate depression. [26–28] Smoking  
41  
42 213 status was classified as no (never smoked, <4 years), and yes ( $\leq 4$  years not smoking, still  
43  
44 214 smoking). Missing values in the covariates were dummy coded and included as “Missing”  
45  
46 215 category in the analysis.

### 53 216 **Statistical analyses**

56 217 Descriptive statistics were sociodemographic variables and mean and percentages of LTCI

1  
2  
3  
4 218 costs over six years were stratified according to the two stratified groups: zero, and more  
5  
6 219 typology. Percentage comparisons were analyzed using the chi-square test. Next, the six-year  
7  
8 220 cumulative LTCI costs were used as the independent variable to evaluate the association with  
9  
10 221 oral function. The analysis was conducted using the tobit model,[29,30] taking into account  
11  
12 222 that the independent variable was not normally distributed with a concentration in the zero  
13  
14 223 circles. In the analysis, after initially analyzing with the crude model, the adjustment variables  
15  
16 224 were put in the following order. Age and sex were added to model 1, while physical factors  
17  
18 225 (ADL, GDS, smoking), and socioeconomic background (years of education, marital status,  
19  
20 226 household structure, equivalent income) were added to model 2. Standard errors were used to  
21  
22 227 estimate regression coefficients. Statistical analyses were conducted using STATA SE 15.1  
23  
24 228 (Stata Corp, College Station, Texas, USA). The statistical significance level was set at  $p < 0.05$ .  
25  
26 229 Accumulated care costs depend on the length of time care was needed. Therefore, the rates of  
27  
28 230 those who were certified as needing care and those who died, and the number of days to get  
29  
30 231 there, were calculated for each group in terms of the number of oral problems. Information  
31  
32 232 such as the certification of the need for nursing care and the moving out of the country was  
33  
34 233 provided by the insurer.  
35  
36  
37  
38  
39  
40  
41  
42  
43  
44  
45

#### 236 **Patient and public involvement**

46  
47  
48  
49 237 No patient or the public were involved in the development of research question and design of  
50  
51 238 this study. The results of this research will be disseminated to stakeholders such as local and  
52  
53 239 central health government after being published in a scientific journal.  
54  
55  
56  
57  
58  
59  
60

1  
2  
3  
4 241 **Results**

5  
6  
7 242 The analysis showed that with zero expenses had an average age of 73.0 years, while those  
8  
9 243 using care expenses had an average age of 79.2 years. The minimum cost was 5.00 USD, the  
10  
11 244 maximum cost was 2,35,536.90 USD. Table 1 shows the baseline characteristics of the  
12  
13 245 respondents and the average cumulative LTCI cost. Table 2 shows the Tobit regression  
14  
15 246 differences in cumulative cost of long-term care insurance services by number of oral  
16  
17 247 problems. Table 3 shows rate of those certified as requiring long-term care, mortality, and days  
18  
19  
20 248 by the oral problem.  
21  
22  
23  
24  
25  
26  
27  
28  
29  
30  
31  
32  
33  
34  
35  
36  
37  
38  
39  
40  
41  
42  
43  
44  
45  
46  
47  
48  
49  
50  
51  
52  
53  
54  
55  
56  
57  
58  
59  
60

249 Table 1. Baseline characteristics of the participants and cumulative long-term care insurance costs. (n=46616)

| Variables            | Categories   | total | USD 0 |       | USD 1 or more |       |          |          |                                     |           |          |
|----------------------|--------------|-------|-------|-------|---------------|-------|----------|----------|-------------------------------------|-----------|----------|
|                      |              | n     | n     | %     | N             | %     | mean     | SE       | 95% confidence interval of the mean |           | SD       |
| Sex                  | Male         | 21585 | 18502 | 85.72 | 3083          | 14.28 | 18952.33 | 533.65   | 17905.92                            | 19998.74  | 27590.35 |
|                      | Female       | 25031 | 20766 | 82.96 | 4265          | 17.04 | 24819.77 | 542.73   | 23755.68                            | 25883.86  | 32977.54 |
| Age                  | 65–69        | 13256 | 544   | 4.10  | 12712         | 95.90 | 18183.74 | 1333.29  | 15564.05                            | 20803.44  | 29483.42 |
|                      | 70–74        | 13744 | 1162  | 8.45  | 12582         | 91.55 | 16788.02 | 853.48   | 15113.25                            | 18462.78  | 27404.61 |
|                      | 75–79        | 10536 | 1952  | 18.53 | 8584          | 81.47 | 19843.02 | 690.84   | 18488.04                            | 21198.01  | 28584.58 |
|                      | 80–84        | 6139  | 2134  | 34.76 | 4005          | 65.24 | 23925.24 | 735.67   | 22482.39                            | 25368.10  | 31393.58 |
|                      | 85 and older | 2941  | 1556  | 52.91 | 1385          | 47.09 | 29386.23 | 961.85   | 27499.29                            | 31273.17  | 34839.83 |
| Oral function        | 0.00         | 23298 | 20523 | 88.09 | 2775          | 11.91 | 22038.89 | 573.24   | 20914.88                            | 23162.91  | 30180.78 |
|                      | 1.00         | 12178 | 10137 | 83.24 | 2041          | 16.76 | 22642.72 | 698.77   | 21272.34                            | 24013.10  | 31560.89 |
|                      | 2.00         | 4986  | 3902  | 78.26 | 1084          | 21.74 | 21148.40 | 885.64   | 19410.62                            | 22886.19  | 29091.78 |
|                      | 3.00         | 1720  | 1245  | 72.38 | 475           | 27.62 | 25721.67 | 1671.76  | 22436.66                            | 29006.67  | 36396.87 |
| Choked               | No           | 36349 | 31160 | 85.72 | 5189          | 14.28 | 22501.65 | 434.98   | 21648.89                            | 23354.41  | 30714.88 |
|                      | Yes          | 7259  | 5728  | 78.91 | 1531          | 21.09 | 22103.65 | 862.06   | 20412.57                            | 23794.73  | 32174.66 |
|                      | Missing      | 24    | 16    | 66.67 | 8             | 33.33 | 7911.47  | 4794.59  | -12717.99                           | 28540.92  | 8304.47  |
| Difficulty in eating | No           | 31670 | 27496 | 86.82 | 4174          | 13.18 | 21942.01 | 477.92   | 21005.02                            | 22878.99  | 30245.05 |
|                      | Yes          | 12156 | 9566  | 78.69 | 2590          | 21.31 | 23190.94 | 663.02   | 21890.78                            | 24491.10  | 32311.67 |
|                      | Missing      | 11    | 9     | 81.82 | 2             | 18.18 | 25555.10 | 24512.30 | -285903.20                          | 337013.40 | 34665.63 |
| Dry mouth            | No           | 33482 | 28898 | 86.31 | 4584          | 13.69 | 22103.32 | 458.44   | 21204.56                            | 23002.09  | 30783.74 |



|    |                     |                    |       |       |       |      |       |          |          |            |           |          |
|----|---------------------|--------------------|-------|-------|-------|------|-------|----------|----------|------------|-----------|----------|
| 1  |                     |                    |       |       |       |      |       |          |          |            |           |          |
| 2  |                     |                    |       |       |       |      |       |          |          |            |           |          |
| 3  |                     |                    |       |       |       |      |       |          |          |            |           |          |
| 4  |                     | Yes                | 9374  | 7401  | 78.95 | 1973 | 21.05 | 23117.57 | 730.29   | 21685.29   | 24549.85  | 31580.48 |
| 5  |                     | Missing            | 4     | 1     | 25.00 | 3    | 75.00 | 37865.47 | 33626.18 | -106816.30 | 182547.23 | 58242.25 |
| 6  | Activities of daily | Independent        | 44379 | 37784 | 85.14 | 6595 | 14.86 | 21497.68 | 394.90   | 20723.53   | 22271.82  | 30009.55 |
| 7  | living              | Minimum assist     | 769   | 367   | 47.72 | 402  | 52.28 | 33386.73 | 2107.73  | 29241.06   | 37532.40  | 39149.44 |
| 8  |                     | Assist             | 142   | 96    | 67.61 | 46   | 32.39 | 52744.22 | 10428.07 | 31633.68   | 73854.75  | 65123.31 |
| 9  |                     | Missing            | 1305  | 1014  | 77.70 | 291  | 22.30 | 22182.71 | 1760.23  | 18712.23   | 25653.18  | 25264.02 |
| 10 | Depressive          | No depression      | 27474 | 24093 | 87.69 | 3381 | 12.31 | 20689.68 | 524.96   | 19660.37   | 21718.98  | 29067.64 |
| 11 | symptoms            | Mild depression    | 8196  | 6589  | 80.39 | 1607 | 19.61 | 23907.93 | 875.49   | 22190.53   | 25625.32  | 32932.83 |
| 12 |                     | Depression         | 2721  | 2052  | 75.41 | 669  | 24.59 | 24857.99 | 1422.94  | 22063.24   | 27652.75  | 34268.90 |
| 13 |                     | Missing            | 8225  | 6534  | 79.44 | 1691 | 20.56 | 23475.66 | 868.28   | 21772.27   | 25179.04  | 31354.46 |
| 14 | Smoking             | No                 | 34788 | 29410 | 84.54 | 5378 | 15.46 | 22621.56 | 444.19   | 21750.74   | 23492.37  | 31258.05 |
| 15 |                     | Yes                | 6952  | 5948  | 85.56 | 1004 | 14.44 | 20498.76 | 986.93   | 18561.88   | 22435.64  | 30032.53 |
| 16 |                     | Missing            | 4876  | 3910  | 80.19 | 966  | 19.81 | 23183.46 | 1341.24  | 20548.12   | 25818.81  | 29598.54 |
| 17 | Marital status      | Married            | 32764 | 28632 | 87.39 | 4132 | 12.61 | 19436.49 | 473.92   | 18507.31   | 20365.68  | 28506.40 |
| 18 |                     | Others             | 12684 | 9741  | 76.80 | 2943 | 23.20 | 26439.03 | 669.37   | 25126.47   | 27751.60  | 33761.73 |
| 19 |                     | Missing            | 1168  | 895   | 76.63 | 273  | 23.37 | 23211.96 | 2153.29  | 18966.15   | 27457.77  | 30679.67 |
| 20 | Living arrangement  | Living with others | 39644 | 33827 | 85.33 | 5817 | 14.67 | 21730.41 | 426.36   | 20894.56   | 22566.27  | 30397.54 |
| 21 |                     | Living alone       | 6163  | 5441  | 88.28 | 1531 | 24.84 | 24835.00 | 921.89   | 23026.41   | 26643.58  | 33008.39 |
| 22 | Equivalent income   | Low                | 19176 | 16151 | 84.23 | 3025 | 15.77 | 22321.17 | 605.88   | 21133.14   | 23509.21  | 31318.70 |
| 23 |                     | Middle             | 14462 | 12585 | 87.02 | 1877 | 12.98 | 21747.74 | 758.07   | 20260.87   | 23234.61  | 31062.52 |
| 24 |                     | High               | 4117  | 3625  | 88.05 | 492  | 11.95 | 20363.70 | 1361.97  | 17687.00   | 23040.39  | 28763.09 |
| 25 |                     | Missing            | 8861  | 6907  | 77.95 | 1954 | 22.05 | 23632.21 | 778.56   | 22105.09   | 25159.34  | 30829.37 |
| 26 |                     |                    |       |       |       |      |       |          |          |            |           |          |
| 27 |                     |                    |       |       |       |      |       |          |          |            |           |          |
| 28 |                     |                    |       |       |       |      |       |          |          |            |           |          |
| 29 |                     |                    |       |       |       |      |       |          |          |            |           |          |
| 30 |                     |                    |       |       |       |      |       |          |          |            |           |          |
| 31 |                     |                    |       |       |       |      |       |          |          |            |           |          |
| 32 |                     |                    |       |       |       |      |       |          |          |            |           |          |
| 33 |                     |                    |       |       |       |      |       |          |          |            |           |          |
| 34 |                     |                    |       |       |       |      |       |          |          |            |           |          |
| 35 |                     |                    |       |       |       |      |       |          |          |            |           |          |
| 36 |                     |                    |       |       |       |      |       |          |          |            |           |          |
| 37 |                     |                    |       |       |       |      |       |          |          |            |           |          |
| 38 |                     |                    |       |       |       |      |       |          |          |            |           |          |
| 39 |                     |                    |       |       |       |      |       |          |          |            |           |          |
| 40 |                     |                    |       |       |       |      |       |          |          |            |           |          |
| 41 |                     |                    |       |       |       |      |       |          |          |            |           |          |
| 42 |                     |                    |       |       |       |      |       |          |          |            |           |          |
| 43 |                     |                    |       |       |       |      |       |          |          |            |           |          |
| 44 |                     |                    |       |       |       |      |       |          |          |            |           |          |
| 45 |                     |                    |       |       |       |      |       |          |          |            |           |          |
| 46 |                     |                    |       |       |       |      |       |          |          |            |           |          |

1  
2  
3  
4  
5  
6  
7  
8  
9  
10  
11  
12  
13  
14  
15  
16  
17  
18  
19  
20  
21  
22  
23  
24  
25  
26  
27  
28  
29  
30  
31  
32  
33  
34  
35  
36  
37  
38  
39  
40  
41  
42  
43  
44  
45  
46

|           |             |       |       |       |      |       |          |         |          |          |          |
|-----------|-------------|-------|-------|-------|------|-------|----------|---------|----------|----------|----------|
| Education | 6–9 years   | 22235 | 18271 | 82.17 | 3964 | 17.83 | 23266.45 | 545.68  | 22196.56 | 24336.34 | 32037.63 |
|           | 10–12 years | 15182 | 13147 | 86.60 | 2035 | 13.40 | 20946.62 | 689.82  | 19593.68 | 22299.56 | 29217.84 |
|           | >13 years   | 7889  | 6917  | 87.68 | 972  | 12.32 | 19434.13 | 977.85  | 17514.89 | 21353.37 | 28726.15 |
|           | Missing     | 1310  | 933   | 71.22 | 377  | 28.78 | 29673.63 | 2083.82 | 25570.31 | 33776.94 | 33665.16 |

For peer review only

251

252 Next, to investigate the relationship between oral function and the costs associated with the use  
 253 of LTCI, we conducted a tobit analysis using the data on cumulative LTCI costs over six years  
 254 as the independent variable, and oral function as the explanatory variable (Table 2). Compared  
 255 to persons with normal oral function, the model in which age, sex, social environment, and  
 256 physical factors were inputted, showed that costs for people with one oral function problem  
 257 were (B=4020,35), two oral function problems ( B=4775,48), and three oral function problems  
 258 (B=8292,83), to be more than those with normal oral function.

259

260 Table 2. Tobit regression differences in cumulative cost of long-term care insurance services by number of  
 261 oral problems

| Explanatory   | Categories     | Crude Model                        | Model 1                           | Model 2                         |
|---------------|----------------|------------------------------------|-----------------------------------|---------------------------------|
|               |                | B (95% CI)                         | B (95% CI)                        | B (95% CI)                      |
| Oral function | normal         | reference                          | reference                         | reference                       |
|               | One problem    | 10414.23<br>(8712.39 to 12116.06)  | 6532.43<br>(4909.64 to 8155.22)   | 4020.35<br>(2348.95 to 5691.75) |
|               | Two problems   | 18217.95<br>(15986.76 to 20449.15) | 10028.46<br>(7922.02 to 12134.91) | 4775.48<br>(2569.12 to 6981.85) |
|               | Three problems | 28416.51                           | 17793.12                          | 8292.83                         |

16

(25114.68 to 31718.34) (14699.14 to 20887.10) (4999.92 to 11585.74)

---

262

263 Unit: USD 1  $\doteq$  100 JPY

264 Model 1: adjusting for age, sex

265 Model 2: further adjusting for activity of daily living, current smoking, depressive symptoms, equivalent

266 income, education, marital status, household structure

267 B: partial regression coefficient, CI: confidence interval

268

269 The impact of oral function on the cost of long-term care services was examined. The analysis  
 270 was based on the cumulative cost of care during the follow-up period. According to oral  
 271 function, the percentages of persons requiring certification for the need for long-term care, and  
 272 death or displacement are as follows: among those with three problems, 36.8% were certified  
 273 as needing long-term care, compared to 16.7% for those with preserved oral function. Death  
 274 and displacement also occurred in 20.6% of those with three problems compared to 9.1% of  
 275 those with preserved oral function. The number of days to certification for the need for long-  
 276 term care and death or relocation also decreased with decrease in the number of oral function  
 277 problems. Oral function affected the cost of long-term care services, when the cumulative long-  
 278 term care costs during the follow-up period were analyzed.(Table 3)

279

280 Table 3. Rate of those certified as requiring long-term care and mortality and days by the oral problem

281

| Oral function  | Requiring long-term care |          |                                  | Mortality |          |                               |
|----------------|--------------------------|----------|----------------------------------|-----------|----------|-------------------------------|
|                | n                        | (%)      | First time days to certification | n         | (%)      | Days to death or displacement |
| Normal         | 3081                     | (16.70%) | 1928.77                          | 1674      | (9.10%)  | 2024.14                       |
| One problem    | 2167                     | (22.40%) | 1874.07                          | 1214      | (12.60%) | 1987.63                       |
| Two problems   | 1148                     | (29.30%) | 1814.63                          | 636       | (16.20%) | 1945.89                       |
| Three problems | 484                      | (36.80%) | 1725.16                          | 271       | (20.60%) | 1891.41                       |
| total          | 6880                     | (20.70%) | 1799.69                          | 3795      | (11.40%) | 1943.58                       |

282

283

## 284 Discussion

285 This study is the first to examine the differences between the degree of oral function and  
 286 associated cumulative LTCI costs. In examining cumulative LTCI costs over six years, our  
 287 results indicated that cumulative LTCI costs were higher for those with oral function problems  
 288 compared to those with maintained oral function. A difference of 4,000 to 8,200 USD in  
 289 cumulative LTCI costs over six years was observed between those with maintained oral  
 290 function and those with oral function problems. Further, higher number of oral function  
 291 problems were associated with higher future LTCI costs.

292

293 The cost of care was found to be related to physical function, socioeconomic background, and  
 294 the care environment. Decline in ADL together with depression, as well as equivalent income,  
 295 and years of education were also associated with the cost of care. In terms of marital status,

18

1  
2  
3  
4 296 costs were higher for those who were not married. Further, women were more likely to be in  
5  
6 297 the higher cost group than men. This is consistent with another report that showed 34.0% of  
7  
8 298 caregivers were male,[1] indicating that women use care services more when they required,  
9  
10 299 which also indicates a problem in the caregiving environment.  
11  
12

13  
14 300

15  
16 301 An analysis of the degree of oral function and 6-year cumulative LTCI costs in Table 2 shows  
17  
18 302 a difference in cumulative LTCI costs for those with declining oral function compared with  
19  
20 303 maintained oral function. As an explanation for this, an association between physical function  
21  
22 304 and oral health has been reported in older people with impaired oral function. The number of  
23  
24 305 chewable foods and bite strength has been associated with leg extension power and time spent  
25  
26 306 standing on one leg,[31,32] and the risk of falling is 2.5 times higher among those with 19 or  
27  
28 307 fewer teeth compared to those with 20 or more teeth.[33]  
29  
30  
31  
32

33 308

34  
35 309 Oral function is also associated with mental function and dementia. Poor quality of life related  
36  
37 310 to oral hygiene increases the risk of depressive symptoms among older people.[34] In terms of  
38  
39 311 cognitive function, those with few teeth and no dentures have a 1.9 times higher likelihood of  
40  
41 312 having dementia than those with 20 or more teeth.[35] Severe periodontitis, a possible cause  
42  
43 313 of tooth loss, is associated with Mild Cognitive Impairment(MCI).[36] As retained teeth  
44  
45 314 decrease, the number of occlusal surfaces decreases. Low occlusal contact and consumption of  
46  
47 315 soft foods are risk factors for Alzheimer's disease.[37] Regarding the association between  
48  
49 316 frailty and oral function, older patients with frailty have significantly reduced oral function,  
50  
51 317 which is associated with lower occlusal force, masseter muscle thickness, and oral  
52  
53 318 diadochokinesis rate.[38] A study on older people in Japan demonstrated that one of the risk  
54  
55  
56  
57  
58  
59  
60

1  
2  
3  
4 319 of requiring long-term care is frailty.[39] From these findings, it can be inferred that a decline  
5  
6 320 in oral function is closely related to physical, mental, and cognitive function and is a factor in  
7  
8 321 the development of the need for long-term care. The risk of needing long-term care, and  
9  
10 322 certification for requirement of long-term care are assumed to be associated with the use of  
11  
12  
13 323 long-term care services and thus, with the cumulative cost of LTCI costs.

14  
15 324 However, in a similar study examining the association with cumulative LTCI costs, cumulative  
16  
17 325 LTCI costs were 600 USD higher over six years (100 USD per year) for those who were less  
18  
19 326 physically active than for those who had normal physical active.[28] In addition, caregiving  
20  
21 327 costs were 1,200 USD lower over six years (200 USD per year) for those who participated in  
22  
23 328 social activities such as hobbies and sports groups, compared to those who did not.[40] These  
24  
25 329 are certainly reasonable explanations for the results indicating an association of high cost with  
26  
27 330 oral function decline, which is a risk of needing care, and high cost with oral function decline,  
28  
29 331 which was 4,000 to 8,200 USD over six years (670 to 1,360 USD per year) for those whose  
30  
31 332 function declined compared to those in whom oral function was maintained in the present  
32  
33  
34 333 study.

35  
36  
37  
38  
39 334

40  
41 335 The cost per beneficiary per year in 2020 for the elderly in Japan was 2.09 million USD.[41]  
42  
43 336 There was a concomitant increase in cost, with each increase in oral function problems. For  
44  
45 337 those with one oral function problem, the cost increase was 19.3% of the total, it was 22.7%  
46  
47 338 for those with two, and 39.5% for those with three. When the cumulative long-term care costs  
48  
49 339 during the follow-up period were analyzed by oral function, it was found to affect the cost of  
50  
51 340 long-term care services. People with good oral function may have a shorter duration of need  
52  
53  
54 341 for long-term care during the follow-up period.

1  
2  
3  
4 342 Previous studies related to eating difficulties have also reported that fewer teeth and denture  
5  
6 343 use are associated with mortality[42,43], and less foods can be chewed by those who require  
7  
8 344 nursing care.[32] Self-reported surveys have reported that mastication disorders are associated  
9  
10 345 with an increased risk of mortality among older persons.[44] In a study related to oral dryness,  
11  
12 346 it was reported that lip strength and lip dexterity are decreased in persons requiring nursing  
13  
14 347 care,[45] and weak lip strength is also associated with oral dryness as is the length of time spent  
15  
16 348 opening the mouth. Dysphagia is associated with frailty.[46,47] Increased problems with oral  
17  
18 349 function increase the need for nursing care and the risk of death, which can have a serious  
19  
20 350 impact on the health status of older adults with poor oral function, consistent with previous  
21  
22 351 research on the need to provide effective oral health care and reduce the burden of oral disease,  
23  
24 352 as well as its impact on general health.[48]

25  
26  
27  
28  
29 353 In this study, chewing hard food, choking, and thirst were evaluated. It is desirable to maintain  
30  
31 354 these functions to reduce the future cost of care. It has been reported that bite and chewing  
32  
33 355 strength related to difficulty in chewing hard foods, hyoid muscle related to swallowing, and  
34  
35 356 xerostomia can be improved by functional training.[49-54] For patients with oral problems,  
36  
37 357 early professional care and efforts to maintain oral function may help control future LTCI costs.  
38  
39 358 Since oral function deterioration can also lead to dysphagia, it is hoped that in the future this  
40  
41 359 will lead to a reduction in deaths from aspiration pneumonia, the leading cause of death in  
42  
43 360 Japan.[34]

44  
45  
46  
47  
48 361 Based on these results, we attempted to estimate the total cost savings in Japanese LTCI if  
49  
50 362 these goals were achieved; 18.9% of all people in Table 1 had two or more oral problems. The  
51  
52 363 difference in cumulative LTCI costs would be 477,000 USD for two functional declines or  
53  
54 364 795,000 USD per year. Applying the results of this study, in a community of 10,000 elderly  
55  
56 365 adults, 1,890 of them would have oral function impairment. The preservation of oral function



1  
2  
3  
4 366 could lower the individuals cost of care. In addition, 76.8% of those with oral dysfunction did  
5  
6 367 not use long-term care services, even though they had oral dysfunction. Preventive intervention  
7  
8 368 for those with oral function loss, who are not using services will prevent the risk of further  
9  
10 369 functional decline and serious illness in the future.

### 13 370 **Strengths**

16 371 The strength of this study is that we analyzed merged individual data from questionnaires on  
17  
18 372 social life and public claim records as they pertain to long-term care services. More  
19  
20 373 specifically, we used a large-scale dataset involving data from numerous municipalities.

### 23 374 **Limitations**

26 375 There are five limitations of this study. First, because this is a questionnaire survey, it does not  
27  
28 376 capture the entire population of older people including those living at home. The study  
29  
30 377 population was limited to older adults who were not certified as needing long-term care at the  
31  
32 378 time of the survey; it was also limited to older adults who could be combined with the actual  
33  
34 379 long-term care insurance benefits held by the government six years later. Second, the data in  
35  
36 380 this study consisted of surveys conducted at the municipal level, where cooperation was  
37  
38 381 obtained, and selection bias may exist. The data are biased due to a valid response rate of  
39  
40 382 64.7%. Third, the follow-up period was only six years, which is far too short to reflect the  
41  
42 383 lifetime cost of care. Future studies should incorporate a longer follow-up period. Fourth, the  
43  
44 384 data are not adjusted for diseases. There may be confounding factors that were not taken into  
45  
46 385 account in the analyses in this study. Fifth, our data did not take into account the type of health  
47  
48 386 care services used. Depending on the services used, the patient may already be receiving  
49  
50 387 professional care related to oral organ function. Future surveys should also analyze by type of  
51  
52 388 service.

## 389 **Conclusions**

390 The degree of oral function in older people was found to be associated with cumulative LTCI  
391 costs. The oral function of older people should be maintained to reduce future accumulated  
392 LTCI costs. There was a difference in cumulative LTCI costs between those with preserved  
393 oral function and those with declining oral function. Compared to those whose oral function  
394 was maintained, those with oral function problems had approximately 4,000 to 8,000 USD  
395 higher cumulative LTCI costs over six years. There was a maximum difference of  
396 approximately 82,000 USD in long-term care service costs for those with oral function  
397 problems. The more the oral function problems, larger the difference. Maintaining the oral  
398 functions of older people may lead to a reduction in future accumulated LTCI costs.

## 400 **Acknowledgments**

401 This study used data from the Japan Gerontological Evaluation Study (JAGES), conducted by  
402 the Center for Well-being and Society, Nihon Fukushi University, as one of their research  
403 projects. Editorial support in the form of medical writing was obtained from Editage.

## 405 **Author contribution**

406 All authors contributed to the conception and design of this study. Data collection was  
407 primarily conducted by MS, YM, EO, and TO. Analyses were performed by KK and supported  
408 by MS, YM, EO, and TO. KK prepared the initial manuscript and MS, YM, EO, and TO  
409 significantly contributed to revising it. All authors read and approved the final manuscript.

410

**Funding**

This study was supported by the Japan Society for the Promotion of Science (JSPS) KAKENHI (18H00953) and the Japan Agency for Medical Research and Development (AMED) (19dk0110037h0001) and the Health and Labour Sciences Research Grant (21LA1003).

The baseline survey was conducted by the Japan Gerontological Evaluation Study (JAGES). This survey was supported by JSPS KAKENHI (20H00557, JP15H01972, 21K17303), a Health Labour Sciences Research Grant (H28-Choju-Ippan-002), AMED (JP20dk0110034, JP17dk0110017, JP18dk0110027, JP18ls0110002, JP18le0110009, JP19dk0110034, and JP19dk0110037), Open Innovation Platform with Enterprises, Research Institute and Academia (OPERA, JPMJOP1831) from the Japan Science and Technology (JST), a grant from the Innovative Research Program on Suicide Countermeasures (1–4), a grant from the Sasakawa Sports Foundation, a grant from the Japan Health Promotion & Fitness Foundation, a grant from the Chiba Foundation for Health Promotion & Disease Prevention, the 8020 Research Grant for the fiscal year of 2019 from the 8020 Promotion Foundation (19-2-06), a grant from Niimi University (1915010), grants from the Meiji Yasuda Life Foundation of Health and Welfare, and Research Funding for Longevity Sciences from the National Center for Geriatrics and Gerontology (20-19, 29-42, 30-22). The funders had no role in study.

**Disclaimer**

The views and opinions expressed in this article are those of the authors and do not necessarily reflect the official policy or position of the respective funding organizations.

**Conflicts of interest**

The authors have no competing interests to declare.

1  
2  
3  
4 433 **Patient consent for publication**

5  
6  
7 434 Not required.

8  
9  
10 435 **Institutional review board statement**

11  
12 436 This study was approved by the Ethics Committee on the Research of Human Subjects at Nihon  
13  
14 437 Fukushima University (no. 10-05). This study was conducted through a collaborative research  
15  
16 438 agreement with the associated municipalities. JAGES participants were informed that  
17  
18 439 participation in the study was voluntary, and that completing and returning the questionnaire  
19  
20 440 via mail indicated their consent to participate in the study. We obtained written informed  
21  
22 441 consent from the participants.  
23  
24

25  
26  
27 442 **Provenance and peer review**

28  
29 443 Not commissioned; externally peer reviewed.  
30  
31

32  
33 444 **Data availability statement**

34  
35 445 Data are not open for public due to ethical concerns. Data are from the JAGES study whose  
36  
37 446 authors may be contacted at data management committee: [dataadmin@jages.net](mailto:dataadmin@jages.net). The data set  
38  
39 447 has ethical or legal restrictions because it includes human participants.  
40  
41  
42

43 448  
44  
45  
46  
47  
48  
49  
50  
51  
52  
53  
54  
55  
56  
57  
58  
59  
60

1  
2  
3  
4 **References**

- 5  
6  
7 450 1 Cabinet Office, Government of Japan, *Chapter 1. Aging situation*. Available from:  
8  
9 451 [https://www8.cao.go.jp/kourei/whitepaper/w-2018/html/zenbun/s1\\_2\\_2.html](https://www8.cao.go.jp/kourei/whitepaper/w-2018/html/zenbun/s1_2_2.html). In: *White paper*  
10  
11 452 *on aging society*; 2018.
- 12  
13 453 2 Ministry of Health, Labour and Welfare. *Long-term care insurance business status report*,  
14  
15 454 Available from: <https://www.mhlw.go.jp/topics/kaigo/osirase/jigyoyo/19/> [original in Japanese]  
16  
17 455 [accessed Nov 25, 2022]
- 18  
19 456 3 Ministry of Health, Labour and Welfare. Overview of national medical expenses, Available  
20  
21 457 from: <https://www.mhlw.go.jp/toukei/saikin/hw/k-iryohi/13/index.html>2015. [original in  
22  
23 458 Japanese] [accessed Nov 25, 2022]
- 24  
25 459 4 Ministry of Health, Labour and Welfare Outline of Long-Term Care Insurance System  
26  
27 460 [https://www.mhlw.go.jp/stf/seisakunitsuite/bunya/hukushi\\_kaigo/kaigo\\_koureisha/gaiyo/inde](https://www.mhlw.go.jp/stf/seisakunitsuite/bunya/hukushi_kaigo/kaigo_koureisha/gaiyo/index.html)  
28  
29 461 [x.html](https://www.mhlw.go.jp/stf/seisakunitsuite/bunya/hukushi_kaigo/kaigo_koureisha/gaiyo/index.html) [original in Japanese] [accessed Nov 8, 2022].
- 30  
31 462 5 Statistics Bureau of Japan. Population estimation. Available from:  
32  
33 463 <https://www.stat.go.jp/english/data/jinsui/tsuki/index.html>2022.
- 34  
35 464 6 Ministry of Health, Labour and Welfare. About the first long-term care insurance premium  
36  
37 465 and expected service amount, *etc.* during the 8th long-term care insurance business plan period.  
38  
39 466 *Overview of 2020 statistics on actual conditions of long-term care costs*. [original in Japanese]  
40  
41 467 [cited Jun 14 2022]. Available from:  
42  
43 468 <https://www.mhlw.go.jp/toukei/saikin/hw/kaigo/kyufu/20/index.html>.
- 44  
45 469 7 Murakami M, Hirano H, Watanabe Y, Sakai K, Kim H, Katakura A. Relationship between  
46  
47 470 chewing ability and sarcopenia in Japanese community-dwelling older adults. *Geriatr Gerontol*  
48  
49 471 *Int.* 2015;15(8):1007-12. doi: 10.1111/ggi.12399, PMID 25363233.
- 50  
51 472 8 Bässler R. Histopathology of different types of atrophy of the human tongue. *Pathol Res*

- 1  
2  
3  
4 473 *Pract.* 1987;182(1):87-97. doi: 10.1016/S0344-0338(87)80147-4, PMID 3588408.
- 5  
6 474 9 Chen LK, Liu LK, Woo J, Assantachai P, Auyeung TW, Bahyah KS et al. Sarcopenia in  
7  
8 475 Asia: consensus report of the Asian Working Group for Sarcopenia. *J Am Med Dir Assoc.*  
9  
10 476 2014;15(2):95-101. doi: 10.1016/j.jamda.2013.11.025, PMID 24461239.
- 11  
12  
13 477 10 Fujishima I, Fujiu-Kurachi M, Arai H, Hyodo M, Kagaya H, Maeda K et al. Sarcopenia and  
14  
15 478 dysphagia: position paper by four professional organizations. *Geriatr Gerontol Int.*  
16  
17 479 2019;19(2):91-7. doi: 10.1111/ggi.13591, PMID 30628181.
- 18  
19  
20 480 11 Serra-Prat M, Palomera M, Gomez C, Sar-Shalom D, Saiz A, Montoya JG et al.  
21  
22 481 Oropharyngeal dysphagia as a risk factor for malnutrition and lower respiratory tract infection  
23  
24 482 in independently living older persons: a population-based prospective study. *Age Ageing.*  
25  
26 483 2012;41(3):376-81. doi: 10.1093/ageing/afs006, PMID 22311895.
- 27  
28  
29 484 12 Tanaka T, Takahashi K, Hirano H, Kikutani T, Watanabe Y, Ohara Y et al. Oral frailty as a  
30  
31 485 risk factor for physical frailty and mortality in community-dwelling elderly. *J Gerontol A Biol*  
32  
33 486 *Sci Med Sci.* 2018;73(12):1661-7. doi: 10.1093/gerona/glx225, PMID 29161342.
- 34  
35  
36 487 13 Neelamana SK, Janakiram C. Characterizing the literature on validity and assessment tool  
37  
38 488 of oral frailty: A systematic scoping review. *J Contemp Dent Pract.* 2022;23(6):659-68. doi:  
39  
40 489 10.5005/jp-journals-10024-3346, PMID 36259308.
- 41  
42  
43 490 14 Thompson B, Cooney P, Lawrence H, Ravaghi V, Quiñonez C. The potential oral health  
44  
45 491 impact of cost barriers to dental care: findings from a Canadian population-based study. *BMC*  
46  
47 492 *Oral Health.* 2014;14:78. doi: 10.1186/1472-6831-14-78, PMID 24962622.
- 48  
49  
50 493 15 Nomura Y, Sato T, Kamoshida Y, Suzuki S, Okada A, Otsuka R et al. Prediction of health  
51  
52 494 care costs by dental health care costs and periodontal status. *Appl Sci.* 2020;10(9):3140. doi:  
53  
54 495 10.3390/app10093140.
- 55  
56 496 16 Münzenmayer MA, Mariño R, Hsueh A. Cost-effectiveness of professional oral health care

- 1  
2  
3  
4 497 in Australian residential aged care facilities. *Gerodontology*. 2019;36(2):107-17. doi:  
5  
6 498 10.1111/ger.12386, PMID 30575992.  
7  
8 499 17 World Health Organization Centre for Health development. *Knowledge translation for*  
9  
10 500 *healthy ageing: the Japan Gerontological Evaluation Study (JAGES)*. Available from:  
11  
12 501 [https://extranet.who.int/kobe\\_centre/en/project-details/knowledge-translation-healthy-ageing-](https://extranet.who.int/kobe_centre/en/project-details/knowledge-translation-healthy-ageing-japan-gerontological-evaluation-study-jages)  
13  
14 502 [japan-gerontological-evaluation-study-jages](https://extranet.who.int/kobe_centre/en/project-details/knowledge-translation-healthy-ageing-japan-gerontological-evaluation-study-jages). [cited Nov 19 2022]'  
15  
16  
17  
18 503 18 Kondo, K., Rosenberg, M. & World Health Organization. (2018). Advancing universal  
19  
20 504 health coverage through knowledge translation for healthy ageing: lessons learnt from the  
21  
22 505 Japan gerontological evaluation study. World Health Organization.  
23  
24 506 <https://apps.who.int/iris/handle/10665/279010>. License: CC BY-NC-SA 3.0 IGO  
25  
26  
27 507 19 Japanese Ministry of Health, Labour and Welfare. The basic checklist; Apr 2016. Available  
28  
29 508 from: <http://www.mhlw.go.jp/topics/kaigo/kaigi/051219/dl/2.pdf>. (in Japanese).  
30  
31 509 20 Ministry of Health, Labour and Welfare. Guidelines for comprehensive projects for care  
32  
33 510 Prevention and daily life support. Ministry of Health, Labour and Welfare; 2022. chrome-  
34  
35 511 extension://efaidnbmnnnibpcajpcglclefindmkaj [cited Nov 6 2022]. Available from:  
36  
37 512 chrome-extension://efaidnbmnnnibpcajpcglclefindmkaj/[https://www.mhlw.go.jp/file/06-](https://www.mhlw.go.jp/file/06-Seisakujouhou-12300000-Roukenkyoku/0000088276.pdf)  
38  
39 513 [Seisakujouhou-12300000-Roukenkyoku/0000088276.pdf](https://www.mhlw.go.jp/file/06-Seisakujouhou-12300000-Roukenkyoku/0000088276.pdf) (in Japanese).  
40  
41 514 21 Arai H, Satake S. English translation of the Kihon checklist. *Geriatr Gerontol Int*.  
42  
43 515 2015;15(4):518-9. doi: 10.1111/ggi.12397, PMID 25828791.  
44  
45 516 22 Sewo Sampaio PY, Sampaio RA, Yamada M, Ogita M, Arai H. Validation and translation  
46  
47 517 of the Kihon checklist (frailty index) into Brazilian Portuguese. *Geriatr Gerontol Int*.  
48  
49 518 2014;14(3):561-9. doi: 10.1111/ggi.12134, PMID 23992357.  
50  
51 519 23 Kamegaya T, Yamaguchi H, Hayashi K. Evaluation by the basic checklist and the risk of 3  
52  
53  
54  
55  
56  
57  
58  
59  
60

- 1  
2  
3  
4 520 years incident long-term care insurance certification. *J Gen Fam Med*. 2017;18(5):230-6. doi:  
5  
6 521 10.1002/jgf2.52, PMID 29264032.
- 7  
8 522 24 Fukutomi E, Okumiya K, Wada T, Sakamoto R, Ishimoto Y, Kimura Y et al. Importance of  
9  
10 523 cognitive assessment as part of the “Kihon Checklist” developed by the Japanese Ministry of  
11  
12 524 Health, Labor and Welfare for prediction of frailty at a 2-year follow up. *Geriatr Gerontol Int*.  
13  
14 525 2013;13(3):654-62. doi: 10.1111/j.1447-0594.2012.00959.x, PMID 23170783.
- 15  
16  
17 526 25 Yesavage JA, Brink TL, Rose TL, Lum O, Huang V, Adey M et al. Development and  
18  
19 527 validation of a geriatric depression screening scale: a preliminary report. *J Psychiatr Res*. 1982-  
20  
21 528 1983;17(1):37-49. doi: 10.1016/0022-3956(82)90033-4, PMID 7183759.
- 22  
23  
24 529 26 Hoyl MT, Alessi CA, Harker JO, Josephson KR, Pietruszka FM, Koelfgen M, et al.  
25  
26 530 Development and testing of a five-item version of the Geriatric Depression Scale. *J Am Geriatr*  
27  
28 531 *Soc*. 1999;47(7):873-8. doi: 10.1111/j.1532-5415.1999.tb03848.x, PMID 10404935.
- 29  
30  
31  
32 532 27 Rinaldi P, Mecocci P, Benedetti C, Ercolani S, Bregnocchi M, Menculini G, et al. Validation  
33  
34 533 of the five-item geriatric depression scale in elderly subjects in three different settings. *J Am*  
35  
36 534 *Geriatr Soc*. 2003;51 (5) :694-8. doi: 10.1034/j.1600-0579.2003.00216.x, PMID 12752847
- 37  
38  
39  
40 535 28 Hirai H, Saito M, Kondo N, Kondo K, Ojima T. Physical activity and cumulative long-term  
41  
42 536 care cost among older Japanese adults: a prospective study in JAGES. *Int J Environ Res Public*  
43  
44 537 *Health*. 2021;18(9):5004. doi: 10.3390/ijerph18095004, PMID 34065052.
- 45  
46  
47  
48 538 29 Tobin J. Estimation of relationships for limited dependent variables. *Econometrica*.  
49  
50 539 1958;26(1):24-36. doi: 10.2307/1907382.
- 51  
52  
53 540 30 Amemiya Y. Instrumental variable estimator for the nonlinear errors-in-variables model.  
54  
55 541 *Journal of Econometrics*. 1985;28(3):273-89. doi: 10.1016/0304-4076(85)90001-6.
- 56  
57  
58  
59  
60



- 1  
2  
3  
4 542 31 Ansai T, Takata Y, Soh I, Akifusa S, Sogame A, Shimada N et al. Relationship between  
5  
6 543 chewing ability and 4-year mortality in a cohort of 80-year-old Japanese people. *Oral Dis.*  
7  
8 544 2007;13(2):214-9. doi: 10.1111/j.1601-0825.2006.01269.x, PMID 17305625.  
9  
10  
11 545 32 Yamaga T, Yoshihara A, Ando Y, Yoshitake Y, Kimura Y, Shimada M et al. Relationship  
12  
13 546 between dental occlusion and physical fitness in an elderly population. *J Gerontol A Biol Sci*  
14  
15 547 *Med Sci.* 2002;57(9):M616-20. doi: 10.1093/gerona/57.9.m616, PMID 12196501.  
16  
17  
18 548 33 Yamamoto T, Kondo K, Misawa J, Hirai H, Nakade M, Aida J et al. Dental status and  
19  
20 549 incident falls among older Japanese: A prospective cohort study. *BMJ Open.*  
21  
22 550 2012;2(4):e001262. doi: 10.1136/bmjopen-2012-001262, PMID 22855628.  
23  
24  
25 551 34 Rouxel P, Tsakos G, Chandola T, Watt RG. Oral Health-A neglected aspect of subjective  
26  
27 552 well-being in later life. *J Gerontol B Psychol Sci Soc Sci.* 2018;73(3):382-6. doi:  
28  
29 553 10.1093/geronb/gbw024, PMID 26970523.  
30  
31 554 35 Aida J, Kondo K, Hirai H, Nakade M, Yamamoto T, Hanibuchi T et al. Association between  
32  
33 555 dental status and incident disability in an older Japanese population. *J Am Geriatr Soc.*  
34  
35 556 2012;60(2):338-43. doi: 10.1111/j.1532-5415.2011.03791.x, PMID 22211817.  
36  
37  
38 557 36 Iwasaki M, Kimura Y, Ogawa H, Yamaga T, Ansai T, Wada T et al. Periodontitis,  
39  
40 558 periodontal inflammation, and mild cognitive impairment: A 5-year cohort study. *J*  
41  
42 559 *Periodontal Res.* 2019;54(3):233-40. doi: 10.1111/jre.12623, PMID 30345659.  
43  
44  
45 560 37 Popovac A, Čelebić A, Peršić S, Stefanova E, Milić Lemić A, Stančić I. Oral Health status  
46  
47 561 and nutritional habits as predictors for developing Alzheimer's disease. *Med Princ Pract.*  
48  
49 562 2021;30(5):448-54. doi: 10.1159/000518258, PMID 34348313.  
50  
51  
52 563 38 Watanabe Y, Hirano H, Arai H, Morishita S, Ohara Y, Edahiro A et al. Relationship between  
53  
54 564 frailty and oral function in community-dwelling elderly adults. *J Am Geriatr Soc.*  
55  
56 565 2017;65(1):66-76. doi: 10.1111/jgs.14355, PMID 27655106.  
57  
58  
59  
60

- 1  
2  
3  
4 566 39 Kitamura A, Seino S, Taniguchi Y, Yokoyama Y, Amano H, Nishi M et al. Impact of  
5  
6 567 lifestyle-related diseases and frailty on the incidence of loss of independence in Japanese  
7  
8 568 community-dwelling older adults: A Longitudinal Study on Aging and Health in Kusatsu.  
9  
10 569 *Nihon Koshu Eisei Zasshi*. 2020;67(2):134-45. doi: 10.11236/jph.67.2\_134, PMID 32092729.  
11  
12  
13 570 40 Saito M, Kondo N, Aida J, Saito J, Anezaki H, Ojima T et al. Differences in cumulative  
14  
15 571 long-term care costs by community activities and employment: A prospective follow-up study  
16  
17 572 of older Japanese adults. *Int J Environ Res Public Health*. 2021;18(10):5414. doi:  
18  
19 573 10.3390/ijerph18105414, PMID 34069391.  
20  
21  
22 574 41 Ministry of Health, Labour and Welfare. Long-term care, health and welfare services for  
23  
24 575 the elderly, statistics on care costs at 2020. [original in Japanese] Available from:  
25  
26 576 <https://www.mhlw.go.jp/wp/hakusyo/kousei/20-2/kousei-data/siryou/sh1000.html>  
27  
28  
29 577 42 Fukai K, Takiguchi T, Ando Y, Aoyama H, Miyakawa Y, Ito G et al. Mortality rates of  
30  
31 578 community-residing adults with and without dentures. *Geriatr Gerontol Int*. 2008;8(3):152-9.  
32  
33 579 doi: 10.1111/j.1447-0594.2008.00464.x, PMID 18821998.  
34  
35  
36 580 43 Yoshida M, Morikawa H, Yoshikawa M, Tsuga K, Akagawa Y. Eight-year mortality  
37  
38 581 associated with dental occlusion and denture use in community-dwelling elderly persons.  
39  
40 582 *Gerodontology*. 2005;22(4):234-7. doi: 10.1111/j.1741-2358.2005.00068.x, PMID 16329232.  
41  
42  
43 583 44 Nakanishi N, Fukuda H, Takatorige T, Tataru K. Relationship between self-assessed  
44  
45 584 masticatory disability and 9-year mortality in a cohort of community-residing elderly people.  
46  
47 585 *J Am Geriatr Soc*. 2005;53(1):54-8. doi: 10.1111/j.1532-5415.2005.53010.x, PMID 15667376.  
48  
49  
50 586 45 Tamura F, Fukui T, Kikutani T, Machida R, Yoshida M, Yoneyama T et al. Lip-closing  
51  
52 587 function of elderly people during ingestion: comparison with young adults. *Int J Orofacial*  
53  
54 588 *Myology*. 2009;35:33-43. doi: 10.52010/ijom.2009.35.1.3, PMID 20572436.  
55  
56 589 46 Yang RY, Yang AY, Chen YC, Lee SD, Lee SH, Chen JW. Association between dysphagia

- 1  
2  
3  
4 590 and frailty in older adults: a systematic review and meta-analysis. *Nutrients*. 2022;14(9):1812.  
5  
6 591 doi: 10.3390/nu14091812, PMID 35565784.  
7  
8 592 47 Baijens LW, Clavé P, Cras P, Ekberg O, Forster A, Kolb GF et al. European Society for  
9  
10 593 Swallowing Disorders - European Union Geriatric Medicine Society white paper:  
11  
12 594 oropharyngeal dysphagia as a geriatric syndrome. *Clin Interv Aging*. 2016;11:1403-28. doi:  
13  
14 595 10.2147/CIA.S107750, PMID 27785002.  
15  
16  
17 596 48 Badewy R, Singh H, Quiñonez C, Singhal S. Impact of poor oral health on community-  
18  
19 597 dwelling seniors: a scoping review. *Health Serv Insights*. 2021;14:1178632921989734. doi:  
20  
21 598 10.1177/1178632921989734, PMID 33597810.  
22  
23  
24 599 49 Ibayashi H, Fujino Y, Pham TM, Matsuda S. Intervention study of exercise program for  
25  
26 600 oral function in healthy elderly people. *Tohoku J Exp Med*. 2008;215(3):237-45. doi:  
27  
28 601 10.1620/tjem.215.237, PMID 18648184.  
29  
30  
31  
32 602 50 Sakayori T, Maki Y, Ohkubo M, Ishida R, Hirata S, Ishii T. Longitudinal evaluation of  
33  
34 603 community support project to improve oral function in Japanese elderly. *Bull Tokyo Dent Coll*.  
35  
36 604 2016;57(2):75-82. doi: 10.2209/tdcpublish.2015-0035, PMID 27320296.  
37  
38  
39 605 51 Sakayori T, Maki Y, Hirata S, Okada M, Ishii T. Evaluation of a Japanese "Prevention of  
40  
41 606 long-term care" project for the improvement in oral function in the high-risk elderly. *Geriatr*  
42  
43 607 *Gerontol Int*. 2013;13(2):451-7. doi: 10.1111/j.1447-0594.2012.00930.x, PMID 22963330.  
44  
45  
46 608 52 Hakuta C, Mori C, Ueno M, Shinada K, Kawaguchi Y. Evaluation of an oral function  
47  
48 609 promotion programme for the independent elderly in Japan. *Gerodontology*. 2009;26(4):250-  
49  
50 610 8. doi: 10.1111/j.1741-2358.2008.00269.x, PMID 19555360.  
51  
52  
53 611 53 Ohara Y, Yoshida N, Kono Y, Hirano H, Yoshida H, Mataka S et al. Effectiveness of an  
54  
55 612 oral health educational program on community-dwelling older people with xerostomia. *Geriatr*  
56  
57 613 *Gerontol Int*. 2015;15(4):481-9. doi: 10.1111/ggi.12301, PMID 24796714.

1  
2  
3  
4 614 54 Easterling C. Does an exercise aimed at improving swallow function have an effect on vocal  
5  
6 615 function in the healthy elderly? *Dysphagia*. 2008;23(3):317-26. doi: 10.1007/s00455-008-  
7  
8 616 9158-z, PMID 18437461.  
9  
10  
11  
12  
13  
14  
15  
16  
17  
18  
19  
20  
21  
22  
23  
24  
25  
26  
27  
28  
29  
30  
31  
32  
33  
34  
35  
36  
37  
38  
39  
40  
41  
42  
43  
44  
45  
46  
47  
48  
49  
50  
51  
52  
53  
54  
55  
56  
57  
58  
59  
60

For peer review only

1  
2  
3  
4  
5  
6  
7  
8  
9  
10  
11  
12  
13  
14  
15  
16  
17  
18  
19  
20  
21  
22  
23  
24  
25  
26  
27  
28  
29  
30  
31  
32  
33  
34  
35  
36  
37  
38  
39  
40  
41  
42  
43  
44  
45  
46  
47  
48  
49  
50  
51  
52  
53  
54  
55  
56  
57  
58  
59  
60

## STROBE Statement—checklist of items that should be included in reports of observational studies

|                              | Item No | Recommendation                                                                                                                                                                                                                                                                                                                                                                                                                                                                 | Page No |
|------------------------------|---------|--------------------------------------------------------------------------------------------------------------------------------------------------------------------------------------------------------------------------------------------------------------------------------------------------------------------------------------------------------------------------------------------------------------------------------------------------------------------------------|---------|
| <b>Title and abstract</b>    | 1       | (a) Indicate the study's design with a commonly used term in the title or the abstract                                                                                                                                                                                                                                                                                                                                                                                         | 2       |
|                              |         | (b) Provide in the abstract an informative and balanced summary of what was done and what was found                                                                                                                                                                                                                                                                                                                                                                            | 3       |
| <b>Introduction</b>          |         |                                                                                                                                                                                                                                                                                                                                                                                                                                                                                |         |
| Background/rationale         | 2       | Explain the scientific background and rationale for the investigation being reported                                                                                                                                                                                                                                                                                                                                                                                           | 5       |
| Objectives                   | 3       | State specific objectives, including any prespecified hypotheses                                                                                                                                                                                                                                                                                                                                                                                                               | 5       |
| <b>Methods</b>               |         |                                                                                                                                                                                                                                                                                                                                                                                                                                                                                |         |
| Study design                 | 4       | Present key elements of study design early in the paper                                                                                                                                                                                                                                                                                                                                                                                                                        | 6       |
| Setting                      | 5       | Describe the setting, locations, and relevant dates, including periods of recruitment, exposure, follow-up, and data collection                                                                                                                                                                                                                                                                                                                                                | 6       |
| Participants                 | 6       | (a) <i>Cohort study</i> —Give the eligibility criteria, and the sources and methods of selection of participants. Describe methods of follow-up<br><br><i>Case-control study</i> —Give the eligibility criteria, and the sources and methods of case ascertainment and control selection. Give the rationale for the choice of cases and controls<br><br><i>Cross-sectional study</i> —Give the eligibility criteria, and the sources and methods of selection of participants | 6,7     |
|                              |         | (b) <i>Cohort study</i> —For matched studies, give matching criteria and number of exposed and unexposed<br><br><i>Case-control study</i> —For matched studies, give matching criteria and the number of controls per case                                                                                                                                                                                                                                                     |         |
| Variables                    | 7       | Clearly define all outcomes, exposures, predictors, potential confounders, and effect modifiers. Give diagnostic criteria, if applicable                                                                                                                                                                                                                                                                                                                                       | 7       |
| Data sources/<br>measurement | 8*      | For each variable of interest, give sources of data and details of methods of assessment (measurement). Describe comparability of assessment methods if there is more than one group                                                                                                                                                                                                                                                                                           | 7,8     |
| Bias                         | 9       | Describe any efforts to address potential sources of bias                                                                                                                                                                                                                                                                                                                                                                                                                      | 6,7     |
| Study size                   | 10      | Explain how the study size was arrived at                                                                                                                                                                                                                                                                                                                                                                                                                                      | 6,7     |

|    |                        |    |                                                                                                                              |
|----|------------------------|----|------------------------------------------------------------------------------------------------------------------------------|
| 1  |                        |    |                                                                                                                              |
| 2  | Quantitative variables | 11 | Explain how quantitative variables were handled in the analyses. If applicable, describe which groupings were chosen and why |
| 3  |                        |    | 6,7,8                                                                                                                        |
| 4  |                        |    |                                                                                                                              |
| 5  | Statistical methods    | 12 | (a) Describe all statistical methods, including those used to control for confounding                                        |
| 6  |                        |    | 9                                                                                                                            |
| 7  |                        |    |                                                                                                                              |
| 8  |                        |    |                                                                                                                              |
| 9  |                        |    | (b) Describe any methods used to examine subgroups and interactions                                                          |
| 10 |                        |    | 9                                                                                                                            |
| 11 |                        |    |                                                                                                                              |
| 12 |                        |    | (c) Explain how missing data were addressed                                                                                  |
| 13 |                        |    | 9                                                                                                                            |
| 14 |                        |    |                                                                                                                              |
| 15 |                        |    | (d) <i>Cohort study</i> —If applicable, explain how loss to follow-up was addressed                                          |
| 16 |                        |    |                                                                                                                              |
| 17 |                        |    | <i>Case-control study</i> —If applicable, explain how matching of cases and controls was addressed                           |
| 18 |                        |    |                                                                                                                              |
| 19 |                        |    | <i>Cross-sectional study</i> —If applicable, describe analytical methods taking account of sampling strategy                 |
| 20 |                        |    |                                                                                                                              |
| 21 |                        |    |                                                                                                                              |
| 22 |                        |    |                                                                                                                              |
| 23 |                        |    | (e) Describe any sensitivity analyses                                                                                        |
| 24 |                        |    |                                                                                                                              |

Continued on next page

1  
2  
3  
4  
5  
6  
7  
8  
9  
10  
11  
12  
13  
14  
15  
16  
17  
18  
19  
20  
21  
22  
23  
24  
25  
26  
27  
28  
29  
30  
31  
32  
33  
34  
35  
36  
37  
38  
39  
40  
41  
42  
43  
44  
45  
46  
47  
48  
49  
50  
51  
52  
53  
54  
55  
56  
57  
58  
59  
60**Results**

|                  |     |                                                                                                                                                                                                              |       |
|------------------|-----|--------------------------------------------------------------------------------------------------------------------------------------------------------------------------------------------------------------|-------|
| Participants     | 13* | (a) Report numbers of individuals at each stage of study—eg numbers potentially eligible, examined for eligibility, confirmed eligible, included in the study, completing follow-up, and analysed            | 10    |
|                  |     | (b) Give reasons for non-participation at each stage                                                                                                                                                         |       |
|                  |     | (c) Consider use of a flow diagram                                                                                                                                                                           |       |
| Descriptive data | 14* | (a) Give characteristics of study participants (eg demographic, clinical, social) and information on exposures and potential confounders                                                                     | 11,12 |
|                  |     | (b) Indicate number of participants with missing data for each variable of interest                                                                                                                          | 11,12 |
|                  |     | (c) <i>Cohort study</i> —Summarise follow-up time (eg, average and total amount)                                                                                                                             | 17    |
| Outcome data     | 15* | <i>Cohort study</i> —Report numbers of outcome events or summary measures over time                                                                                                                          | 13    |
|                  |     | <i>Case-control study</i> —Report numbers in each exposure category, or summary measures of exposure                                                                                                         |       |
|                  |     | <i>Cross-sectional study</i> —Report numbers of outcome events or summary measures                                                                                                                           |       |
| Main results     | 16  | (a) Give unadjusted estimates and, if applicable, confounder-adjusted estimates and their precision (eg, 95% confidence interval). Make clear which confounders were adjusted for and why they were included | 13,14 |
|                  |     | (b) Report category boundaries when continuous variables were categorized                                                                                                                                    |       |
|                  |     | (c) If relevant, consider translating estimates of relative risk into absolute risk for a meaningful time period                                                                                             |       |
| Other analyses   | 17  | Report other analyses done—eg analyses of subgroups and interactions, and sensitivity analyses                                                                                                               | 17    |

**Discussion**

|                  |    |                                                                                                                                                                            |       |
|------------------|----|----------------------------------------------------------------------------------------------------------------------------------------------------------------------------|-------|
| Key results      | 18 | Summarise key results with reference to study objectives                                                                                                                   | 14    |
| Limitations      | 19 | Discuss limitations of the study, taking into account sources of potential bias or imprecision. Discuss both direction and magnitude of any potential bias                 | 15,16 |
| Interpretation   | 20 | Give a cautious overall interpretation of results considering objectives, limitations, multiplicity of analyses, results from similar studies, and other relevant evidence | 16,17 |
| Generalisability | 21 | Discuss the generalisability (external validity) of the study results                                                                                                      | 18    |

**Other information**

|         |    |                                                                                                                                                               |    |
|---------|----|---------------------------------------------------------------------------------------------------------------------------------------------------------------|----|
| Funding | 22 | Give the source of funding and the role of the funders for the present study and, if applicable, for the original study on which the present article is based | 20 |
|---------|----|---------------------------------------------------------------------------------------------------------------------------------------------------------------|----|

1  
2 \*Give information separately for cases and controls in case-control studies and, if applicable, for exposed and  
3 unexposed groups in cohort and cross-sectional studies.  
4  
5  
6

7 **Note:** An Explanation and Elaboration article discusses each checklist item and gives methodological background and  
8 published examples of transparent reporting. The STROBE checklist is best used in conjunction with this article (freely  
9 available on the Web sites of PLoS Medicine at <http://www.plosmedicine.org/>, Annals of Internal Medicine at  
10 <http://www.annals.org/>, and Epidemiology at <http://www.epidem.com/>). Information on the STROBE Initiative is  
11 available at [www.strobe-statement.org](http://www.strobe-statement.org).  
12  
13  
14  
15  
16  
17  
18  
19  
20  
21  
22  
23  
24  
25  
26  
27  
28  
29  
30  
31  
32  
33  
34  
35  
36  
37  
38  
39  
40  
41  
42  
43  
44  
45  
46  
47  
48  
49  
50  
51  
52  
53  
54  
55  
56  
57  
58  
59  
60

For peer review only
